1 Sex-specific and sex-chromosome  
2 regulatory evolution underlie widespread  
3 misregulation of inter-species hybrid  
4 transcriptomes

5

6 Santiago Sánchez-Ramírez<sup>1\*</sup>, Jörg G. Weiss<sup>1</sup>, Cristel G. Thomas<sup>1,2</sup>, Asher D. Cutter<sup>1\*</sup>

7

8 <sup>1</sup>Department of Ecology and Evolutionary Biology, University of Toronto,

9 Toronto, ON, M5S3B2, Canada

10 <sup>2</sup>Los Alamos National Laboratory, Los Alamos, NM, USA

11

12 \*Corresponding authors: [santiago.snchez@gmail.com](mailto:santiago.snchez@gmail.com), [asher.cutter@utoronto.ca](mailto:asher.cutter@utoronto.ca)

13

## 14 Abstract

15 When gene regulatory networks diverge between species, their dysfunctional expression in  
16 inter-species hybrid individuals can create genetic incompatibilities that underlie the  
17 developmental defects responsible for intrinsic post-zygotic reproductive isolation. Divergence  
18 in *cis*- and *trans*-acting regulatory controls evolve despite stabilizing selection on gene  
19 expression, being hastened by directional selection with adaptation, sexual selection, and inter-  
20 sexual conflict. Dysfunctional sex-biased gene expression, in particular, may provide an  
21 important source of genetic incompatibilities, with more severe misregulation expected for the  
22 heterogametic sex. Here, we characterize and compare male and female transcriptome profiles  
23 for sibling species of *Caenorhabditis* nematodes, *C. briggsae* and *C. nigoni*, and allele-specific  
24 expression in their F<sub>1</sub> hybrids to deconvolve features of expression divergence and regulatory  
25 dysfunction. Despite evidence of widespread stabilizing selection on gene expression, we find  
26 broad misregulation of sex-biased genes in F<sub>1</sub> hybrids that is most pronounced for the X-  
27 chromosome, supporting a "large-X" effect, and that counters expectations by  
28 disproportionately affecting hybrid females. Hybrid male misexpression, however, is greater in  
29 magnitude, with spermatogenesis genes especially prone to high divergence in both expression  
30 and coding sequences that may explain elevated sterility of hybrid males, consistent with  
31 "faster male" and "fragile male" models for Haldane's rule. Regulatory and coding divergence  
32 overall correlate only weakly, however, and downregulation of male-biased genes in females  
33 implicates *trans*-acting modifiers in the evolutionary resolution of inter-sexual conflicts. This  
34 work identifies important differences between the sexes in how regulatory networks diverge  
35 that contributes to sex-biases in how genetic incompatibilities manifest during the speciation  
36 process.

37

38 **Keywords:** *Caenorhabditis*, regulatory evolution, sex-biased expression, genome evolution,  
39 genetic incompatibilities, hybridization, *cis-trans* regulation, Haldane's rule

## 40 Author's summary

41 Many mutations that affect traits as species diverge do so by altering gene expression. Such  
42 gene regulatory changes also accumulate in the control of static traits, due to compensatory  
43 effects of mutation on multiple regulatory elements. Theory predicts many of these changes to  
44 cause inter-species hybrids to experience dysfunctional gene expression that leads to reduced  
45 fitness, disproportionately affecting the sex chromosomes and sex-biased gene expression. Our  
46 analyses of genome-wide expression data from *Caenorhabditis* nematode roundworms support  
47 these predictions. We find widespread rewiring of gene regulation despite extensive  
48 morphological stasis, and conserved overall expression profiles, that is a hallmark of these  
49 animals. Misregulation of expression in both sexes is most severe for genes linked to the X-  
50 chromosome, sperm genes show distinctive signatures of divergence, and differences between  
51 the sexes in regulatory evolution implicate resolved historical sexual conflicts over gene  
52 expression. This work clarifies how distinct components of regulatory networks evolve and  
53 contribute to sex differences in the manifestation of genetic incompatibilities in the speciation  
54 process.

55

## 56 Introduction

57 Many kinds of reproductive barriers can contribute to speciation (1,2), with genetically intrinsic  
58 post-zygotic barriers a kind that makes speciation irreversible. Such intrinsic barriers result from  
59 disrupted developmental programs due to divergence in the regulatory controls of and  
60 functional activity within genetic networks. Consequently, research for decades has aimed to  
61 decipher the identity and general features of genetic changes that accumulate by selection and  
62 genetic drift to lead to Dobzhansky-Muller (DM) incompatibilities in hybrids of diverging  
63 populations, due to non-additive, negatively-epistatic interactions among genes (1,3). It is  
64 therefore crucial to decipher how genes and gene expression evolve to understand how gene  
65 regulation influences post-zygotic reproductive isolation through misregulated gene  
66 interactions in hybrids (3–6).

67  
68 Evolution of the regulatory controls over gene expression influences much phenotypic  
69 evolution (5,7), despite stabilizing selection as a prevailing force acting to preserve expression  
70 profiles (8–12). Expression differences between species accrue in predictable ways. Regulatory  
71 differences between species disproportionately involve the evolutionary accumulation of  
72 mutations to *cis*-regulatory elements, facilitated by such changes being predisposed to  
73 additivity and low pleiotropy of effects on traits and fitness (13,14). In contrast, larger, more  
74 pleiotropic effects can result from *trans*-regulatory changes that occur at distant genomic  
75 positions, such as to transcription factors, chromatin regulators, and small RNA genes.  
76 Consequently, theory predicts *trans*-regulatory mutations to fix less readily and to contribute  
77 fewer differences between species, despite their large mutational target size and  
78 disproportionate contribution to genetic variation within a species (4,13–15). Studies  
79 nevertheless commonly find both *cis*- and *trans*-regulatory differences between species (16–  
80 19). Indeed, the coevolution of changes to both *cis*- and *trans*-acting factors represents one  
81 plausible outcome of stabilizing selection on expression level. The compensatory effects of such  
82 coevolved *cis*- and *trans*-regulatory changes yield an overall conserved expression profile  
83 (4,11,20), but this multiplicity of changes are predisposed to generating misexpression in  $F_1$   
84 hybrids due to dysfunctional *cis*-by-*trans* regulatory interactions (5,21).

85  
86 Decomposing the changes of gene networks into their *cis*- and *trans*-regulatory components,  
87 however, presents a challenge to studying gene regulatory evolution. One way to address this  
88 problem is with hybrid cross experiments that assess differential expression between two  
89 closely related species and from allele-specific expression (ASE) in their F<sub>1</sub> hybrids (5,11,22).  
90 Differences in gene expression between species reveal the joint effects of *cis*- and *trans*-  
91 regulatory divergence, whereas differences in ASE within F<sub>1</sub> hybrids typically represent the  
92 effects of *cis*-regulatory divergence alone (22). Studies of this kind have unveiled broad  
93 empirical patterns of regulatory evolution, whether carried out in flies (16,23), mice (24), plants  
94 (17,18), or yeast (19,25). In particular, this work has shown substantial regulatory divergence in  
95 both *cis* and *trans*, extensive non-additivity, and disrupted regulation and misexpression in F<sub>1</sub>  
96 hybrids. Whether these patterns hold for the nematode phylum is, as yet, unknown, and the  
97 links between regulatory mechanisms and sex-biases in expression remain incompletely  
98 resolved.

99  
100 Hybrid dysfunction of developmental programs, outward phenotypes, and fitness may often  
101 trace their origins to gene misregulation, from transcriptional to post-translational levels (5,6).  
102 Sex-biased misregulation, therefore, should underlie sex-biased developmental and fitness  
103 effects in hybrid individuals. Misexpression of male-biased genes and genes related to  
104 spermatogenesis links misregulation to male sterility in hybrids, with supporting empirical  
105 evidence in several kinds of animals (24,26–29). In organisms with chromosomal sex  
106 determination, more severe defects typically occur in hybrid individuals carrying heterogametic  
107 sex chromosomes (i.e., XO males in *Caenorhabditis* nematodes). This Haldane's rule pattern can  
108 arise from dominance effects (30), faster molecular evolution of genes with male-biased  
109 expression (31), greater sensitivity of male developmental programs to perturbation (31), and  
110 faster evolution of sex-linked loci (32), among other causes (33,34). Because of the prominent  
111 role that the X-chromosome plays in reproductive isolation (35–37), we might also expect to  
112 find greater expression divergence and misexpression for X-linked genes compared to  
113 autosomes (5,26,27,38,39), with the caveat that genes with male-specific expression might not

114 necessarily be abundant on the X-chromosome (40–42). Thus, distinguishing between abnormal  
115 expression in hybrids for X-linked genes overall and for sex-biased autosomal genes is  
116 important to decipher the genetic mechanisms that underpin Haldane's rule in particular and  
117 hybrid dysfunction in general.

118  
119 *Caenorhabditis* nematode roundworms provide an especially tractable system to study  
120 speciation genomics (34). The growing number of *Caenorhabditis* species known to science  
121 conform to the biological species concept, with a few cases where sibling species can produce  
122 some viable and fertile adult hybrid offspring (43,44). The *C. briggsae* × *C. nigoni* species pair is  
123 one such case, where recent divergence (~3.5 Ma (45)) allows them to form hybrids of both  
124 sexes. Haldane's rule is fulfilled: F<sub>1</sub> male hybrids exhibit both greater infertility and inviability in  
125 crosses of *C. nigoni* females to *C. briggsae* males, with nearly total hybrid male inviability in the  
126 reciprocal cross (46–48). The disproportionate loss of genes with male-biased expression in the  
127 *C. briggsae* lineage has the potential to disrupt genetic networks in a sex-biased way to  
128 disproportionately compromise hybrid male fitness (45,49–51). In an effort to identify and  
129 locate incompatibility loci between these two species, Bi et al. (52) associated hybrid male  
130 inviability and sterility with most of the X-chromosome, suggesting a large-X effect. Moreover,  
131 analysis of X-chromosome introgression lines revealed that X-autosome incompatibility  
132 involving misregulation of the 22G class of small RNAs led to down-regulation of  
133 spermatogenesis genes as a contributor to hybrid male sterility, in addition to autosomal  
134 factors responsible for hybrid inviability (29,53). Here, we analyze mRNA transcriptome  
135 expression for each sex from each of *C. briggsae*, *C. nigoni*, and their F<sub>1</sub> hybrids. Using ASE  
136 profiles, we then quantify *cis*- and *trans*-acting regulatory causes of expression divergence to  
137 link genomic change to sex-biased expression, chromosomal features, and hybrid dysfunction.

## 138 Results

139 Extensive expression divergence between species and between the sexes involve  
140 the X-chromosome  
141 Each species and sex show distinctive overall transcriptome profiles that are further  
142 distinguishable from each sex of F<sub>1</sub> inter-species hybrids (**Fig. 1A**). In the contrast of pure *C.*  
143 *briggsae* and *C. nigoni* transcriptomes, we found more differentially expressed genes for  
144 females and hermaphrodites, hereafter jointly referred to as females for brevity, than for  
145 males. For the 12,115 one-to-one orthologs analyzed, females had a total of 66% (7,903) of  
146 genes differentially expressed between species, compared to 53% (6,391) for males (**Fig. 1B**).  
147 The X-chromosome shows the most extreme differences in expression between species, with  
148 both males and females showing significantly higher expression of X-linked genes in *C. briggsae*  
149 than in *C. nigoni* (**Fig. 1C**). Autosomes, by contrast, showed greater abundance of genes with  
150 higher expression in *C. nigoni*, albeit only significantly only for Chromosome I in females (**Fig.**  
151 **1C**; Fisher's exact test;  $P < 0.05$ ).  
152  
153 Within each species, approximately half of genes exhibited significant sex biases in expression,  
154 which, in turn, are roughly evenly divided between male- and female-biased expression: 28%  
155 male-biased genes in *C. briggsae* (3,353 genes), 26% male-biased genes in *C. nigoni* (3,188  
156 genes), 26% female-biased genes in *C. briggsae* (3,205 genes), and 24% female-biased genes in  
157 *C. nigoni* (2,878 genes). Male-biased genes did not exhibit strong enrichment for any  
158 chromosome in either species, whereas female-biased genes in *C. briggsae* were 1.6-fold  
159 enriched on Chromosome I and 3.3-fold depleted on the X-chromosome (**Fig. 1E**), consistent  
160 with previous studies in *Caenorhabditis*. The X-chromosome is significantly enriched, however,  
161 for non-sexually differentiated genes in both *C. briggsae* and *C. nigoni* (Fisher's exact test,  $P <$   
162  $0.05$ ) (**Fig. 1E**). Overall, expression profiles for *C. briggsae* hermaphrodites were masculinized  
163 relative to *C. nigoni* females (**Fig. 1A**), consistent with hermaphrodite production of both sperm  
164 and oocytes in an otherwise morphologically female soma.

165

166 Expression dominance in F<sub>1</sub> hybrids differs between males and females  
167 We contrasted expression profiles of F<sub>1</sub> hybrids with their parent species to infer the expression  
168 inheritance of genes, i.e., to identify genes that exhibited additive, dominant (*C. briggsae*- and  
169 *C. nigoni*-like expression), or transgressive (overdominant and underdominant) expression  
170 patterns for each sex (**Fig. 2A**). Gene sets with distinct expression inheritance profiles revealed  
171 substantial differences between the sexes in terms of expression distance (**Fig. 2B**), number of  
172 genes (**Fig. 2C**), and enrichment across the genome (**Fig. 2D**).

173  
174 The sexes differed most strikingly in their total number of transgressive genes (**Fig. 2C**).  
175 Transgressive genes are thought to be associated with hybrid dysfunction, as they represent  
176 expression phenotypes that are distinct from expression levels in either parent (28,54). Despite  
177 our expectation of an especially high number of misregulated genes in F<sub>1</sub> males due to their  
178 pronounced sterility, we found that just 21% (2,552) of genes show transgressive profiles in  
179 males (1,387 overdominant and 1,165 underdominant) compared to 55% (6,729) in females  
180 (3,284 overdominant and 3,445 underdominant) (**Fig. 2A,C**). However, we also found that  
181 Euclidean expression distances from the centroid of expression space are higher on average in  
182 males than in females for both overdominant (ordinary least-squared [OLS] regression,  $t = 6.28$ ,  
183  $P < 0.001$ ) and underdominant genes (OLS,  $t = 2.14$ ,  $P < 0.05$ ), indicating especially deviant  
184 expression magnitude for those fewer transgressive genes in F<sub>1</sub> males (**Fig. 2A,B**). By contrast,  
185 genes with simple dominance or additive expression in F<sub>1</sub> males had consistently lower  
186 expression distance from the centroid than did F<sub>1</sub> females (**Fig. 2A,B**; OLS,  $P < 0.05$ ). These  
187 results are consistent with our multidimensional scaling analysis (**Fig. 1A**) that showed shorter  
188 expression distances for F<sub>1</sub> males to parental males, in contrast to more dissimilar expression  
189 profiles of F<sub>1</sub> females to parental females.

190  
191 F<sub>1</sub> hybrids of both sexes had a relatively low percentage of genes with additive expression (6%  
192 or 698 genes in females; 7% or 872 genes in males) (**Fig. 2C**). By contrast, approximately 30% of  
193 genes expressed by each sex showed simple dominance, either matching *C. briggsae* or *C.*  
194 *nigoni* expression (27% or 3,878 genes in females; 31% or 3,297 genes in males). Hybrids of



195 both sexes consistently showed a higher number of genes with expression dominance matching  
196 *C. briggsae* (20% or 2,408 genes in males and 16% or 1,904 genes in females), compared to  
197 expression dominance matching *C. nigoni* (**Fig. 2C**; 12% or 1470 genes in males and 11% or 1393  
198 in females). In both sexes, the ratio of genes with simple dominance matching either *C.*  
199 *briggsae* or *C. nigoni* expression is close to 1:1 consistently across all five autosomes (mean  
200 ratio = 1.15, sd = 0.13). In F<sub>1</sub> females, the X-chromosome, however, was 4-fold biased towards  
201 expression dominance matching *C. briggsae* (**Fig. 2C,D**).

202  
203 Genes and traits with dysfunctional expression are often associated with the X-chromosome,  
204 and differences between the sexes are expected due to Haldane's rule (24,26,27,38). Consistent  
205 with these expectations, we found expression heritability profiles in F<sub>1</sub> males and females to  
206 vary across the genome, and to differ most conspicuously for the X-chromosome. The X-  
207 chromosome was enriched for underdominant genes in both F<sub>1</sub> males and females (**Fig. 2C,D**;  
208 Fisher's exact test,  $P < 0.05$ ). The X-chromosome was also enriched for overdominant genes in  
209 F<sub>1</sub> males, whereas females had significant depletions of such genes on the X (autosomal  
210 enrichments: V in males, I and III in females) (**Fig. 2C,D**). These data show clear differences in  
211 expression heritability across chromosomes between the sexes and reflect distinct hybrid  
212 expression dynamics between autosomal and X-linked genes.

213  
214 Regulatory divergence is modulated by differences in *cis* and *trans* effects between  
215 sexes

216 Identifying the spectrum of changes in *cis*- and *trans*-acting regulators is important to  
217 understand how selection influences the evolution of gene expression and its effects on hybrid  
218 phenotypes. Correspondingly, we classified the types of regulatory changes and examined gene  
219 misregulation in F<sub>1</sub> hybrids for each sex. We found that most expression divergence between  
220 species results from *cis*-only, *trans*-only, and enhancing *cis-trans* gene regulatory divergence  
221 (**Fig. 2E,F**), consistent with other ASE studies in flies (16,23), mice (24), plants (17,18) and yeast  
222 (19,25). Comparing regulatory divergence between sexes, we found double the number of  
223 *trans*-only changes involving genes expressed in females (20% or 2,461 genes) compared to

224 males (10% or 1,230 genes) (**Fig. 2G**). However, the sexes showed a reciprocal pattern for genes  
225 with *cis*-only divergence being more prevalent in males than in females (21% or 2,559 genes in  
226 males; 17% or 2,089 genes in females). Genes with *cis*-only and *trans*-only effects were not  
227 significantly enriched on any autosome for either sex, but genes expressed in males showed  
228 strong enrichment on the X-chromosome for *trans*-only regulatory changes as well as a  
229 depletion for *cis*-only changes (**Fig. 2H**; Fisher's exact test,  $P < 0.05$ ). While genes with *C.*  
230 *briggsae* expression dominance were commonly associated with *cis*-only effects, especially in  $F_1$   
231 males, genes with *C. nigoni* dominant expression tended to show *trans*-only effects, especially  
232 for autosomes in  $F_1$  females (**Fig. 3**). In contrast, X-linked genes in  $F_1$  females rarely showed *C.*  
233 *nigoni* expression dominance displayed by either *cis*-only or *trans*-only effects (**Fig. 3**). In  
234 contrast, X-linked genes in both sexes have up to 3-fold higher proportion of genes showing *C.*  
235 *briggsae* expression dominance more often associated with *trans*-only effects (432:106 *C.*  
236 *briggsae* : *C. nigoni* in females; 329 : 274 in males) (**Fig. 3**). This skew is particularly notable for  
237  $F_1$  males given that they carry the *C. nigoni* X-chromosome, and therefore these genes would be  
238 both misexpressed and misregulated. These observations together illustrate how regulatory  
239 changes have evolved in sex-specific ways toward disproportionately *cis*-only changes in males  
240 and *trans*-only changes in females, in addition to divergent impacts on the X-chromosome and  
241 on overall expression profiles between the parent species.

242  
243 Furthermore, we categorized genes into 13 groups based on distinct combinations of species  
244 differences and sex differences in expression, including their interactions and looked at the  
245 proportion of genes with different *cis*- and *trans*-effects (gene groups M0-M12; **Fig. 4A,E**).  
246 Consistent with the idea that *cis* and *trans* changes each play distinct roles in sex-biased  
247 expression and sexual dimorphism (55), we find, on one hand, that *trans*-only changes in  
248 females are more often associated with male-biased genes, and on the other hand, that female-  
249 biased genes show more *cis*-only regulatory changes in males (**Fig. 4E**). This pattern suggests  
250 that different sex-specific regulatory controls have evolved to repress expression of genes  
251 biased for the opposite sex.

252

253 Hybrid misexpression is commonly due to overdominance involving genes with  
254 joint *cis-trans* regulatory changes  
255 Genes exhibiting additive or transgressive expression profiles in F<sub>1</sub> hybrids are often associated  
256 with dysfunctional traits, due to radically different expression from those of parent species.  
257 Genes with additive expression heritability may commonly reflect *cis*-only regulatory  
258 divergence, such that allele-specific transcriptional differences generate intermediate  
259 expression profiles in F<sub>1</sub> hybrids (22,26,56). In line with this idea, we often found genes  
260 classified as additive to associate more often with significant *cis*-acting divergence in both sexes  
261 (i.e., *cis*-only and enhancing *cis-trans* effects; **Fig. 3; Supplementary Fig. S4**). However,  
262 expression additivity is not abundant in our analysis (**Fig. 2C**), suggesting that it is not a major  
263 source of phenotypic dysfunction in hybrids of this system.  
264  
265 Stabilizing selection on expression level is thought to be common in many species, at the  
266 molecular level enabled through the coevolutionary fine-tuning by changes to *cis*- and *trans*-  
267 acting factors (7,12). *cis* and *trans* changes with opposing effects can interact epistatically in  
268 hybrids to induce dysfunctional expression and allelic imbalance (21). Consistent with this idea,  
269 we found that transgressive genes with overdominant effects in hybrids often are associated  
270 with *cis-trans* regulatory changes in hybrids (43% or 539 genes in males and 42% or 1,312 genes  
271 in females; **Fig. 3**). In F<sub>1</sub> males, a higher fraction of changes was compensatory (26%) compared  
272 to enhancing (17%). F<sub>1</sub> females had the opposite pattern: a higher fraction of genes showed  
273 enhancing compared to compensatory changes (26% versus 16%). In contrast to genes with  
274 such overdominant expression profiles in F<sub>1</sub> hybrids, underdominant genes consistently  
275 exhibited more conserved regulatory controls in both sexes (53% or 577 genes in males and  
276 50% or 1,541 genes in females identified as conserved or ambiguous), suggesting alternative  
277 mechanisms of regulatory dysfunction. These results highlight how stabilizing selection can act  
278 differently on sex-specific transcript abundance, leading to opposing *cis* and *trans* effects that  
279 are dysfunctional in F<sub>1</sub> hybrids.  
280

281 To further assess the role that different regulatory controls play in the origin and maintenance  
282 of divergent sex-biased expression, we contrasted expression heritability and patterns of *cis*-  
283 and *trans*-regulatory divergence for male-biased and female-biased genes (**Fig. 4D,E**). We found  
284 that male-biased genes expressed in F<sub>1</sub> females frequently show transgressive misexpression  
285 (underdominant) or have expression levels matching those of the species with lower expression  
286 (**Fig. 4A,D**). In contrast, male-biased genes expressed in F<sub>1</sub> males tend to show expression  
287 dominance matching *C. briggsae*, regardless of which pure species had higher gene expression  
288 (**Fig. 4A,D**).

289  
290 Interestingly, genes expressed in F<sub>1</sub> males are more commonly underdominant when they  
291 correspond to male-biased genes than to genes that have a female-biased expression pattern  
292 (623 genes among male-biased genes vs 281 genes among female-biased genes), suggesting  
293 male-biased regulatory networks are more fragile. This idea is also supported by male-biased  
294 genes having a higher proportion of genes with enhancing or compensatory *cis-trans* changes  
295 (835 genes in male-biased genes vs 398 genes in female-biased genes). By contrast, female-  
296 biased genes in F<sub>1</sub> females are predominantly overdominant (**Fig. 4D**) and are more often  
297 associated with *cis* and enhancing *cis-trans* changes, which suggest that female gene regulatory  
298 networks can be more resilient to misexpression, which may translate to similar resilience for  
299 traits such as fertility (46).

300  
301 Faster regulatory and molecular evolution of male-biased and spermatogenesis  
302 genes  
303 Sexual selection and sexual conflict are predicted to drive faster rates of molecular evolution  
304 and expression divergence (36,57,58). Consistent with these predictions, we found that male-  
305 biased genes have higher average expression divergence (OLS,  $P < 0.001$ ) and faster rates of  
306 molecular evolution ( $K_a/K_s$ , OLS,  $P < 0.05$ ) than female-biased genes (**Fig. 4B,C**). Compared to  
307 sex-neutral genes, however, the signal for faster sequence evolution was weak ( $K_a/K_s$  OLS,  $P =$   
308 0.3), despite remaining strong for elevated expression divergence (OLS,  $P < 0.001$ ).

309

310 We observed the highest expression divergence as well as high average rates of molecular  
311 evolution in the distinctive set of genes with male-biased expression, higher expression in *C.*  
312 *briggsae* than *C. nigoni*, and with a species-by-sex interaction (M6) (**Fig. 4B,C**). The species-by-  
313 sex interaction in M6 indicated a masculinized expression profile for *C. briggsae*  
314 hermaphrodites, implicating a role for them in sperm production. To test this idea, we looked at  
315 *C. elegans* genes previously identified as spermatogenesis genes (42) and found their orthologs  
316 in *C. briggsae* and *C. nigoni* to be 13-fold enriched in the M6 group (**Fig. 4F**; Fisher's exact test,  $P$   
317  $< 0.05$ ) and depleted from the X-chromosome, consistent with previous observations for sperm  
318 genes in *Caenorhabditis* (34,40,41).

319  
320 These orthologs to spermatogenesis genes, however, did not show strong misexpression (i.e.,  
321 overdominant and underdominant genes) or enrichment of misexpressed genes in F<sub>1</sub> hybrid  
322 males among autosomes, except for chromosome V (**Fig. 4G,H** upper panel). More commonly,  
323 they showed expression dominance matching *C. nigoni* (24% or 225 genes vs. 12% or 109 *C.*  
324 *briggsae* dominant genes) or had no change in expression from either parent (38% or 360 genes  
325 for "no change" and "ambiguous" categories). For F<sub>1</sub> males, X-linked genes showing expression  
326 divergence and dominance matching *C. briggsae* levels in hybrid males should be effectively  
327 misexpressed, as regulation is controlled mostly by *trans*-acting factors coming from the *C.*  
328 *briggsae* autosomal background that interact with the *C. nigoni*-derived X-chromosome, and  
329 therefore represent misexpression (**Supplementary Fig. S3**; also see (26)). We observed a 1.4-  
330 fold enrichment, although not significant (Fisher's exact test,  $P = 0.31$ , odds ratio = 1.42), of  
331 genes with these effects on the X-chromosome of hybrid males (**Fig. 4H**). Furthermore,  
332 transgressive expression on the X-chromosome in F<sub>1</sub> males should be driven by enhancing  
333 and/or compensatory *cis-trans* changes, for which we observed significant enrichments on the  
334 X (**Fig. 4H** lower panel; Fisher's exact test,  $P < 0.05$ ). Together, these results show that, although  
335 there are fewer X-linked spermatogenesis genes compared to autosomes (**Fig. 4G**), they show  
336 high levels of X-linked expression dysfunction (61%, 37 genes of 61 X-linked genes). In addition,  
337 it suggests that modest number of key genes may dictate X-autosome incompatibilities and X-  
338 linked misregulation and misexpression with effects on hybrid male fertility.

339  
340 Genome architecture and molecular evolution moderately affect regulatory  
341 divergence  
342 Given that protein-coding sequence evolution and gene composition vary non-randomly along  
343 chromosomes in many *Caenorhabditis* species in association with the chromosomal  
344 recombination landscape, we asked whether distinct chromosomal domains would also  
345 associate with the degree of *cis*-regulatory divergence. We find higher molecular divergence  
346 between the genomes of *C. briggsae* and *C. nigoni* in chromosomal arms compared to centers  
347 in noncoding sequences upstream of protein-coding genes (**Fig. 5A**), in addition to protein-  
348 coding sequence divergence (**Supplementary Fig. S5**; also see (45)). These observations are  
349 consistent with the idea of stronger purifying selection on mutations to genes and their *cis*-  
350 regulatory regions when linked to chromosome centers. Despite the elevated molecular  
351 divergence in arm regions (**Fig. 5A**), we only found modest elevation of ASE divergence for  
352 genes on arms, being strongest for chromosome V for both sexes (**Fig. 5B**). Moreover, we found  
353 no significant differences in the magnitude of regulatory divergence, in either *cis* or *trans*,  
354 between chromosome arms and centers (**Fig. 5C**; *cis*-only OLS, male *P* value = 0.51, female *P*  
355 value = 0.62; *trans*-only OLS, male *P* value = 0.18, female *P* value = 0.44). Similarly, we observed  
356 only a weak positive correlation between ASE divergence and rates of molecular evolution (**Fig.**  
357 **5D-F**, linear regression for  $K_a/K_s$ : adjusted *R* = 0.019, *m* = 0.015, *P* < 0.0001;  $K_a$ : adjusted *R* =  
358 0.023, *m* = 0.006, *P* < 0.0001;  $1-P_{\text{cons}}$ : adjusted *R* = 0.003, *m* = 0.01, *P* < 0.0001). Overall, these  
359 patterns indicate that rates of divergence for gene expression and their *cis*-regulatory controls  
360 are largely decoupled from protein-coding sequence evolution.  
361

## 362 Discussion

363 Regulatory control over gene expression is an important component of phenotypic evolution  
364 (13). As species diverge and accumulate mutations, selection will permit regulatory changes  
365 that maintain transcript levels as well as changes that allow exploration of new phenotypic  
366 space when they confer a fitness advantage. Sexual selection and sexual conflict can further  
367 promote such genomic divergence, both in terms of molecular evolution (e.g., rapid coding or  
368 regulatory sequence evolution for male-biased genes) and in terms of gene expression (e.g.,  
369 divergence in sex-biased gene expression levels) (36,57,58). In interspecies hybrids, sexually  
370 driven sources of genomic divergence can disrupt gene networks to create negative epistatic  
371 interactions that manifest as sex-biased hybrid sterility or inviability and generate reproductive  
372 isolation. Here we document extensive regulatory divergence in the face of both conserved and  
373 divergent gene expression, with prominent influences of sex-biases and genomic location on  
374 the potential to induce misexpression in interspecies hybrids.

375  
376 Symmetry in species- and sex-specific ratios of differentially expressed genes  
377 implicates extensive developmental system drift  
378 *C. briggsae* and *C. nigoni* acquired substantial divergence at the DNA level since they diverged  
379 from their common ancestor ~35 million generations ago (3.5 Mya assuming 10 generations per  
380 year), including ~20% sequence divergence for synonymous sites, changes to genome size, and  
381 disproportionate loss of short male-biased genes in *C. briggsae* since its transition in  
382 reproductive mode to androdioecy (45,51). Despite this genomic divergence, hybridization  
383 between these species yields viable and fertile F<sub>1</sub> females, while hybrid males suffer complete  
384 sterility and severe inviability depending on the cross direction (34,46). While in some systems,  
385 such as fruit flies and plants, hybrids can exhibit an expression bias towards the parental  
386 species tending to show higher expression (16,18,23), we observe no such effect (**Fig. 1B**;  
387 Fisher's exact test, *P* value = 0.76). This symmetry in expression suggests that demographic  
388 effects do not bias regulatory changes toward either increased or decreased expression in this  
389 system, as could occur if regulatory changes fix more rapidly in species like *C. briggsae* with

390 lower effective population sizes. However, autosomes tend to have more genes with slightly  
391 higher expression in *C. nigoni* whereas X-linked genes tend to have much higher expression in *C.*  
392 *briggsae*. This chromosomal pattern implicates a disproportionate role for divergence of the X-  
393 chromosome in mediating misexpression in *Caenorhabditis* hybrids.

394  
395 Despite our evidence of substantial expression divergence, 34% of genes in females (4,212  
396 genes) and 47% of genes in males (5,724 genes) show no differential expression between  
397 species. Stabilizing selection on transcript abundance is recognized as a common force acting to  
398 conserve expression levels between species (8–10,12). Mechanistically, conservation of the  
399 expression phenotype can occur, despite sequence evolution, when co-evolution changes both  
400 *cis*- and *trans*-regulatory elements: if a *trans*-acting mutation fixes due to a pleiotropic benefit  
401 on other loci, selection would favor fixation of any subsequent compensatory mutation in *cis*  
402 that returns expression to optimal levels at the focal locus (5,59). We find evidence of extensive  
403 compensatory *cis-trans* divergence in gene regulation between *C. briggsae* and *C. nigoni*. Such  
404 coevolution represents just one mechanism leading to "developmental system drift," in which  
405 the molecular controls over developmental pathways can diverge while resulting in little or no  
406 change to their phenotypic outputs (4,60,61). In *Caenorhabditis* nematodes, developmental  
407 system drift and stabilizing selection have been invoked as mechanisms leading to a high  
408 degree of phenotypic stasis and morphological constraint (62–65). Gene network conservation  
409 despite *cis*-regulatory divergence has been demonstrated by inter-species promoter swaps in  
410 *Caenorhabditis*, showing both robustness in regulatory networks and new functionalization in  
411 specific cell types (20,66,67). Our results overall support these views.

412  
413 However, sequence divergence and developmental system drift in regulatory pathways  
414 occurring after speciation are expected to resolve deleterious transcriptomic changes  
415 differently and independently among diverging lineages. In hybrids, uncoupled regulatory  
416 mechanisms from the two parental genomes can lead hybrids to experience misregulation and  
417 therefore misexpression (6). Such a mechanism underlying misexpression could represent a  
418 Dobzhansky-Muller incompatibility because genetic interactions untested by natural selection



419 will likely be detrimental (1). The clearest signal of misexpression in hybrids is the sharp  
420 contrast in the fraction of sex-biased genes: ~90% in hybrids vs ~50 in each parental species  
421 (**Fig. 1D**). Moreover, the usual depletion of female-biased gene expression from *Caenorhabditis*  
422 X-chromosomes is even more extreme in F<sub>1</sub>s due in part to transgressive underdominance  
423 effects and, unusually, the X-chromosome is highly enriched for male-biased expression in F<sub>1</sub>s  
424 (**Figs. 1E, 2C,D**) (40,41). The strong downward misexpression (underdominance) observed for  
425 the X in females, but not as strong for the X of males is likely to be responsible for this trend. In  
426 combination with our analyses showing extensive compensatory *cis-trans* regulatory  
427 divergence, these results implicate extensive developmental systems drift of genetic networks  
428 between *C. briggsae* and *C. nigoni*.

429  
430 Sex-specific and chromosome-dependent *cis-* and *trans-*regulatory changes  
431 contribute to differences in F<sub>1</sub> hybrid expression inheritance between sexes  
432 Abundant transgressive expression is a signature of rampant misexpression in F<sub>1</sub> hybrids. In  
433 particular, studies in flies and mice have shown that misexpression of X-linked genes confers  
434 male sterility in F<sub>1</sub> interspecies hybrids (24,27,28,68), which contributes to more severe hybrid  
435 male dysfunction (Haldane's rule). *C. briggsae* × *C. nigoni* hybrids also obey Haldane's rule (46–  
436 48), so we expected more misexpression in hybrid males. In contrast, we find that it is hybrid  
437 females that experience more extensive transgressive misexpression of genes across the  
438 genome that exceed the expression extremes of either parental species (**Fig. 2A,C**). Most  
439 female-biased transgressive genes show overdominant misexpression whereas male-biased  
440 transgressive genes tend toward underdominant misexpression (M8-M12 vs M3-M7, **Fig. 4D**).  
441 Excluding spermatogenesis genes (most of which are male-biased, but also expressed in *C.*  
442 *briggsae* hermaphrodites; **Fig. 4F**), it is plausible that *cis-* and/or *trans-*regulatory changes  
443 acquired after speciation favoring female-biased expression experienced selection to sustain  
444 upregulation, behaving in an overdominant manner in hybrids. Indeed, overdominant genes  
445 with *cis-trans* divergence in females have disproportionately evolved "enhancing" regulatory  
446 changes (**Figs. 2G, 3, 4E**). The low magnitude of expression divergence among overdominant  
447 and female-biased genes (**Figs. 2B, 4B**), however, together with the fact that hybrid females are

448 fertile, suggests that overdominant expression does not impact fitness as negatively as does  
449 regulatory divergence that leads to underdominance in hybrids.

450  
451 Interestingly, we find that regulatory controls suppressing or enhancing male-biased expression  
452 in  $F_1$  females is largely due to *trans*-only regulatory changes, particularly among genes that  
453 show both male-biased expression and expression divergence between the parent species (**Fig.**  
454 **4E**). Many of these *trans*-acting regulatory changes tend to be more strongly associated with *C.*  
455 *nigoni* dominant expression in females among autosomes, contrasting with *cis*-regulatory  
456 changes which are more strongly associated with *C. briggsae* dominant expression in males  
457 (**Fig. 3**). These results align well with observations of downregulation of spermatogenesis genes,  
458 such as *fog-1*, by specific transcription factors (i.e., *tra-1*), and sperm-specific expression  
459 depending more on upstream promoter regions than 3-UTRs in *C. elegans* (69,70). One  
460 potential explanation involves the fixation of regulatory changes that facilitate resolution of  
461 genomic inter-sexual conflict through sex-biased expression (i.e., Rice's hypothesis (71)). For  
462 example, more sexual conflict is expected in outcrossing than selfing species, such as *C. nigoni*,  
463 due to stronger sexual selection of male traits (72). To avoid traits that are detrimental to  
464 females but improve male performance, genomic conflict resolution by means of sex-biased  
465 expression may be attained faster through *trans*-regulatory changes, which are more  
466 pleiotropic, downregulating male-biased genes in females. This logic aligns with the hypothesis  
467 that sex-biased expression is partly driven by selection acting to resolve sexual conflict by  
468 means of modifier alleles or regulators (55,71). However, the fact that *trans*-only regulatory  
469 changes do not predominate in the control of female-biased genes in males (**Fig. 4E**), suggests  
470 that regulatory mechanism to resolve genomic sexual conflict act in different ways for the two  
471 sexes.

472  
473 Several studies associate regulatory divergence in *cis*-acting factors with genome-wide  
474 expression profiles that enhance sex-specific traits and sex-biased expression (55,73,74). Our  
475 analyses are consistent with these observations in terms of the higher proportion of genes  
476 under *cis*-only compared to *trans*-only regulatory divergence among genes with significant sex-

477 biased expression in their respective sex (i.e., male-biased in males; **Fig. 4E**). When also  
478 considering genes with *cis-trans* divergence, however, we see that a large portion of sex-biased  
479 genes show significant *trans*-divergence (**Fig. 4E**; **Supplementary Fig. S6**), highlighting the  
480 importance of both *cis* and *trans* effects for the development of sexually dimorphic traits in  
481 *Caenorhabditis*.

482  
483 The abundance of underdominant genes in hybrid females, while perhaps counterintuitive, is  
484 not surprising in this system given that the egg-bearing sex in the *C. briggsae* parent is actually  
485 a hermaphrodite. Many of the genes in hybrid females that show underdominant effects would  
486 otherwise show male-biased expression (**Fig. 4B**), suggesting that they may compromise  
487 spermatogenesis to effectively convert F<sub>1</sub> hermaphrodites into females; a complementary view  
488 to the idea that hermaphroditism is 'recessive' to femaleness in a simple Mendelian manner  
489 (46).

490  
491 The role of faster evolution in male-biased genes and autosome vs X-chromosome  
492 incompatibilities in hybrid male dysfunction

493 Because of sexual selection and sexual conflict, male-biased genes are expected to evolve  
494 faster, resulting in higher rates of protein-coding and gene expression divergence (36,57,58).  
495 Faster evolution of male-biased genes is the premise behind the "faster male" and "fragile  
496 male" hypotheses to explain the high incidence of hybrid male sterility in XY and X0  
497 heterogametic systems (31). While we find that male-biased genes collectively do not show a  
498 strong signal of faster molecular evolution, the subset of male-biased genes that show  
499 exceptionally high expression divergence do have faster evolving coding sequences (M4 and  
500 M6; **Fig. 4A-C**). Additionally, these genes are implicated in spermatogenesis, based on *C.*  
501 *elegans* orthologs, and show upregulated expression in sperm-producing *C. briggsae*  
502 hermaphrodites as well as males of both species (M6; **Fig. 4F**). These findings accord with faster  
503 molecular evolution of spermatogenesis and male germline genes of *C. elegans* (75–77). Their  
504 rarity on the X-chromosome (**Fig. 4G**), however, suggests the "faster X" model does not provide  
505 a compelling explanation for Haldane's rule on hybrid sterility (32). Nevertheless, our

506 transcriptome analyses support the idea that the X-chromosome plays an especially important  
507 role in hybrid male sterility. This "large-X" effect arises despite just a few highly dysfunctional X-  
508 autosome incompatibilities between *C. briggsae* x *C. nigoni* potentially explaining hybrid male  
509 sterility (52,53), in contrast to the numerous X-linked hybrid male sterility factors reported for  
510 *Drosophila* (35,37).

511  
512 Gene expression in hybrid males predominantly shows either simple dominance or no change  
513 (**Fig. 2C**). While it is tempting to speculate that regulatory changes affecting males tend to be  
514 generally more conserved as males of different species share the same reproductive role,  
515 reduced sexual selection in *C. briggsae* males (77), genomic divergence (50,51), and clear sex  
516 differences in hybrid fertility (46,47), suggest otherwise. If most transgressive expression occurs  
517 in the gonad, then the small and defective gonad development of F<sub>1</sub> males may have led to  
518 their observed paucity of transgressive expression. Two non-mutually exclusive ways in which  
519 hybrid male dysfunction (i.e., sterility) can arise are: 1) through misexpression and  
520 misregulation of X-linked genes involved with male function, and 2) through negative epistatic  
521 interactions (i.e., incompatibilities) between X-linked and autosome genes involved in male-  
522 specific pathways. Our results suggest that both cases are plausible.

523  
524 First, the paucity of X-linked sex-biased genes in parental genotypes of *Caenorhabditis* species  
525 suggests that any misregulation and misexpression on the X might exert little downstream  
526 impact (**Fig. 1E**; (40,41)). However, misexpression of X-linked genes in hybrids is relatively  
527 common compared to autosomes in both sexes (**Fig. 2D**), with hybrid males having higher  
528 relative incidence of effectively misregulated genes (*trans*-only, enhancing and compensatory  
529 *cis-trans* changes) compared to female hybrids (**Fig. 2H**). We find that *trans*-acting factors often  
530 contribute to misexpression in both sexes (**Figs. 2H, 3**). In hybrid females, *trans*-acting factors  
531 largely drive the expression of X-linked genes with *C. briggsae* dominant and underdominant  
532 expression, unlike autosomes (**Fig. 3**). In hybrid males, this effect is even more pronounced, in  
533 part due to our inference that all X-linked genes with *C. briggsae* dominant expression arise  
534 from *trans*-only effects. These findings are consistent with previous observations, particularly in

535 *Drosophila*, of *trans*-acting changes sex-specific causing misregulation of X-linked genes  
536 (26,74,78).

537  
538 Second, we find extensive expression dominance in F<sub>1</sub> males that disproportionately matches  
539 the *C. briggsae* expression level and that have strong *cis* effects (**Fig. 3**). Many of these genes  
540 also have biased expression of *C. briggsae* alleles (**Supplementary Fig. S7**) and therefore have  
541 the potential of disrupting gene networks as they may interact negatively with *C. nigoni* X-  
542 linked genes in hybrid males. Autosomal spermatogenesis genes, by contrast, tend to show *C.*  
543 *nigoni*-dominant expression in F<sub>1</sub> hybrid males (mean of 2.17-fold difference across autosomes  
544 relative to genes with *C. briggsae*-dominant expression) (**Fig. 4G**), consistent with previous work  
545 showing recessive effects of the *C. briggsae* autosomal portions of genetic incompatibilities  
546 (52). In addition, this prior work also showed that sterility in *C. nigoni* x *C. briggsae* hybrid males  
547 may not require many X-autosome incompatibilities (53). Despite their low abundance on the  
548 X-chromosome, X-linked spermatogenesis genes are often enriched for both misexpression and  
549 misregulation (**Fig. 5C**), potentially enhancing their role in hybrid dysfunction. Interestingly, we  
550 find that at least three X-linked spermatogenesis genes that are effectively misregulated (i.e.  
551 with *trans*-only, *cis-trans* enhancing and *cis-trans* compensatory regulatory changes) also have  
552 high rates of molecular evolution (**Supplementary Fig. S8**) and lie near to an X-chromosome  
553 segment implicated previously in hybrid male sterility (53). Our genome-wide transcriptome  
554 analysis of *cis*- and *trans*-regulatory divergence therefore reinforces some previous key  
555 inferences about hybrid dysfunction associated with males, spermatogenesis, and the X-  
556 chromosome.

557  
558 Modest *cis*-regulatory divergence in spite of fast evolving chromosomal arms  
559 Marked differences in recombination rates along chromosomes can modulate the rate and  
560 number of mutations fixed by direct selection as well as linked selection (79). *Caenorhabditis*  
561 nematodes have distinctive chromosomal arm regions with higher rates of molecular evolution  
562 and polymorphism compared to central regions (**Fig. 5A; Supplementary Fig. S5; (45,80)**), and  
563 therefore have a greater potential to facilitate fixation of weakly beneficial *cis*-regulatory

564 mutations. We first predicted no effect of genomic region on differences in *trans* regulatory  
565 divergence and confirmed this null expectation. *cis*-regulatory divergence, however, showed  
566 only a weak elevation in chromosome arms compared to centers, with the signal being  
567 somewhat stronger in females and for some autosomes (**Fig. 5B,C**). We further looked at  
568 broader correlations for both coding and non-coding upstream sequence divergence with *cis*  
569 regulatory divergence (**Fig. 5D**) and found only weak positive correlations. In line with previous  
570 studies (81,82), these results indicate that rates of regulatory divergence due to *cis*-acting  
571 elements are largely decoupled from rates of molecular evolution.

## 572 Conclusion

573 We contrasted sex-specific transcriptomic profiles between *C. briggsae* and *C. nigoni* and their  
574 hybrids to understand how the evolution of *cis*- and *trans*-regulatory elements can drive F<sub>1</sub>  
575 hybrid dysfunction. Such evolution may arise from divergent expression changes as well as with  
576 stabilizing changes that lead overall expression to remain conserved between species. The  
577 sharp contrast of *Caenorhabditis* morphological stasis and extensive expression conservation  
578 between species with extensive misexpression in F<sub>1</sub> hybrids indicates substantial  
579 developmental system drift of regulatory networks that destabilize in hybrids to enforce  
580 reproductive isolation between species. Despite more extensive transgressive expression in  
581 hybrid females, they are fertile but unable to produce self-sperm compared to the entirely  
582 sterile hybrid males, suggesting that hybrid females may represent "demasculinized"  
583 hermaphrodites through the disruption of sperm-specific regulatory networks. Despite the  
584 rarity of sex-biased genes on the X-chromosome, the X is home to disproportionate  
585 misexpression in both sexes, with misregulation in hybrid males largely through *trans*-acting  
586 factors. X-autosome incompatibilities in hybrid males likely result from the propensity for *C.*  
587 *briggsae*-dominant autosomal expression via *cis*-acting factors yield allele-specific expression  
588 biases, and then interact negatively with *C. nigoni* X-linked genes. Moreover, *C. nigoni*-  
589 dominant *trans*-acting factors may act to downregulate male-biased genes in females,  
590 supporting the idea of genomic sexual conflict resolution through modifier alleles (71). Finally,  
591 we find only weak correlations of *cis*-regulatory divergence with chromosome architecture and  
592 protein-coding and non-coding sequence divergence, indicating that regulatory and protein  
593 evolution are largely decoupled. Consequently, regulatory and structural Dobzhansky-Muller  
594 incompatibilities may accumulate independently of one another, and in distinct ways in the  
595 regulatory networks of each sex, in the build-up of reproductive isolation in the speciation  
596 process.

## 597 Material and Methods

598 Samples, RNA isolation, and sequencing

599 We cultured triplicate populations of isofemale *C. briggsae* (AF16) and *C. nigoni* (JU1421) on  
600 NGM-agar plates with *Escherichia coli* OP50 at 25°C, isolating total RNA via Trizol-chloroform-  
601 ethanol extraction from groups of approximately 500 individual age-synchronized young adult  
602 males or females (hermaphrodites) for each replicate sample. *C. briggsae* hermaphrodites are  
603 treated as the female sex for the purposes of this study, as their soma is phenotypically female  
604 despite the gonad producing a small number of sperm in addition to abundant oocytes. We also  
605 crossed in triplicate virgin *C. nigoni* females to male *C. briggsae* (isolated as L4 larvae) to  
606 produce F<sub>1</sub> hybrid progeny, with RNA isolated from male and female F<sub>1</sub> hybrids as for the  
607 parental pure species genotypes.

608

609 The triplicate mRNA samples for each sex and genetic group (*C. briggsae*, *C. nigoni*, F<sub>1</sub> hybrid)  
610 underwent 100bp read length, single-ended Illumina HiSeq sequencing at GenomeQuebec  
611 according to their standard TruSeq3 protocol. A total of ~250 million reads from these 18  
612 barcoded samples spread across 4 lanes were cleaned for quality control using TRIMMOMATIC  
613 v0.38 (with arguments: ILLUMINACLIP:TruSeq3-SE:2:30:10 LEADING:3 TRAILING:3  
614 SLIDINGWINDOW:4:15 MINLEN:36) (83).

615

616 Reference alignment and allele-specific read assignment

617 Following quality control trimming and filtering, we mapped sequence reads from each sample  
618 to the chromosome-level genome assembly and annotation of each species (*C. briggsae* WS271  
619 <https://osf.io/a4e8g/>, *C. nigoni* 2018-01-WormBase <https://osf.io/dkbwt/>; (51)) using STAR v2.6  
620 (<https://github.com/alexdobin/STAR>; (84)) with default parameters and adjusting for intron size  
621 (--alignIntronMin 40 --alignIntronMax 15600). Reads for all three genotype groups (*C. briggsae*,  
622 *C. nigoni*, F<sub>1</sub> hybrid) were mapped to both reference genomes.

623



624 To obtain allele-specific read counts in F<sub>1</sub> hybrids, we applied a competitive read mapping  
625 approach using a custom Python script (<https://github.com/santiagosnchez/CompMap>) that  
626 uses the PYSAM library (<https://github.com/pysam-developers/pysam>). We then compared the  
627 alignment score (AS) and number of mismatches (nM) to both reference genomes, retaining the  
628 best single read alignments and excluding ambiguous reads (i.e., alignments with the same  
629 value in both parents). We have high power to detect ASE, given ~20% neutral sequence  
630 divergence between *C. briggsae* and *C. nigoni* (45) that confers an expected ~5 nucleotide  
631 differences for every 100 bp of coding sequence (0.2 divergence \* 0.25 fraction of synonymous  
632 sites \* 100 bp). To account for potential mapping bias (85) and unaccounted ambiguous reads,  
633 we subjected all samples to competitive read-mapping (hybrids and pure species) and retained  
634 only unambiguously mapped reads.

635

636 Ortholog identification and read abundance quantification

637 We quantified gene expression abundance for a set of 12,115 genes that we inferred to be one-  
638 to-one reciprocal orthologs between *C. briggsae* and *C. nigoni*. To identify orthologs, we applied  
639 a phylogenetic approach using ORTHOFINDER v2.2.6 (86,87), based on longest-isoform peptide  
640 sequence translations for gene annotations of 28 *Caenorhabditis* species (88)

641 (<http://caenorhabditis.org/>). BLASTp all-by-all searches were done separately on SciNet's

642 Niagara supercomputer cluster. ORTHOFINDER was run with default options, which included: -M  
643 dendroblast (gene tree reconstruction) and -I 1.5 (MCL inflation point). In further analysis of the  
644 final set of 12,115 orthologs, we excluded from a preliminary set of 15,461 orthologs those  
645 genes for *C. briggsae* and *C. nigoni* that could not be assigned to any of their six chromosomes  
646 (688 genes), that were associated with inter-chromosomal translocations (370 genes), that we  
647 could not estimate  $K_a/K_s$  reliably (275 genes), or that exhibited low mRNA-seq read abundance  
648 (2013 genes; see below).

649

650 We quantified gene expression with HTSEQ-count v0.11 (89) for each ortholog in each species,  
651 ignoring strand-specific, non-unique, secondary, and supplementary alignments (arguments: -s  
652 no --nonunique none --secondary-alignments ignore --supplementary-alignments ignore). Raw

653 read counts were combined into a single table and imported into R (90) for normalization and  
654 statistical analyses.

655

656 Differential expression analyses: contrasts between species, hybrids, and sexes  
657 We used the R Bioconductor packages `LIMMA` (91) and `EDGE`R (92) to assess differential  
658 expression. Gene-level raw expression counts were first normalized with `EDGE`R based on library  
659 size using the 'trimmed mean of *M*-values' (TMM) method with the `calcNormFactors` function.  
660 Genes were then filtered based on the amount of expression using `EDGE`R's `filterByExpr` function  
661 (93). Expression counts were then  $\log_2$ -transformed using the `voom` mean-variance trend  
662 method to ensure consistent, normalized read counts across samples (94). Before statistically  
663 assessing differential expression, we summed the allele-specific counts from  $F_1$  hybrids to yield  
664 a single count of transcripts per gene. We visualized the overall expression distance between  
665 samples using a non-metric multi-dimensional scaling plot, which showed all three biological  
666 replicates to cluster consistently within their corresponding treatment (Fig. 1A). We inferred  
667 sex-biased gene expression by comparing differential expression profiles between males and  
668 females (or hermaphrodites) in each genetic group (*C. briggsae*, *C. nigoni*,  $F_1$  hybrids). We also  
669 quantified differential expression between the genetic groups in a pairwise manner (*C. briggsae*  
670 vs  $F_1$ , *C. briggsae* vs *C. nigoni*, *C. nigoni* vs  $F_1$ ) for each sex separately. We then contrasted  
671 expression patterns between species (*C. briggsae* and *C. nigoni*) by looking at sex differences  
672 (sex-biased expression) and their interaction (expression  $\sim$  species \* sex). Linear regression  
673 models were applied to make statistical inferences on differential expression with the `lmFit` and  
674 `eBayes` function in the `LIMMA` package with FDR = 0.05 for multiple test correction.

675

676 Mode of expression inheritance in  $F_1$  hybrids

677 Based on patterns of expression in  $F_1$  hybrids relative to parent species, we classified genes into  
678 those having **additive** (intermediate), **dominant** (matching either of the species), **overdominant**  
679 (higher than both parents), and **underdominant** (lower than both parents) profiles (16)  
680 (McManus et al. 2010). Genes with no significant differences in expression between  $F_1$ s and  
681 their parent species were deemed to have conserved regulatory controls resulting in **no change**

682 in expression in F<sub>1</sub>s. Genes with additive effects had intermediate expression in F<sub>1</sub>s compared to  
683 both parental species, meaning that there were significant differences in expression between  
684 all groups in a manner where expression levels in F<sub>1</sub>s fall in between both species. Genes with  
685 dominant allelic effects were those with expression levels in F<sub>1</sub>s matching either one of the  
686 parent species (i.e. no significant differential expression), but with significant differential  
687 expression between species. Finally, genes with significant differential expression from both  
688 parents, but that were either significantly underexpressed (overdominant) or overexpressed  
689 (underdominant) compared to both species were regarded as transgressive. Genes falling  
690 outside any these specific categories were considered **ambiguous**.

691  
692 We also measured absolute Euclidean distances in expression relative to the centroid or origin  
693 in expression space of F<sub>1</sub> hybrids relative to both parent species. For example, for every gene  
694 we took the expression difference between F<sub>1</sub>s and *C. briggsae* and between F<sub>1</sub>s and *C. nigoni*  
695 as an xy coordinate system. Then, we measured the Euclidean distance from that point in  
696 expression space to the origin (0,0), reflecting no change in expression:

697  
698 
$$d = \sqrt{(\Delta_{F1/Cbr})^2 + (\Delta_{F1/Cni})^2}$$

699 Where  $\Delta_{F1/Cbr}$  and  $\Delta_{F1/Cni}$  are coefficients of differential expression between F<sub>1</sub> hybrids and  
700 each parent species. This metric allowed us to visualize the magnitude of expression distance  
701 from a "conserved" expression profile.

702  
703 *cis*- and *trans*- regulatory divergence

704 We also used ASE in F<sub>1</sub>s to quantify the extent and type of *cis*- and *trans*-regulatory differences  
705 between species. Expression divergence between parent species results from both *cis*- and  
706 *trans*-regulatory changes, whereas significant differential expression between alleles in F<sub>1</sub>s  
707 results from *cis*-regulatory divergence only (16). To quantify the extent of *trans* effects, we  
708 applied a linear model to test for differences in gene expression between parent species (P) and  
709 between alleles in F<sub>1</sub> hybrids (ASE) using the following model: expression ~ species/group,

710 where "group" represented categorical variables pointing to data from P and ASE. The division  
711 operator of the function "/" measures expression ratios independently for each category in  
712 "group". We then used a post-hoc Wald-type test (*linearHypothesis* from the *CAR* package) to  
713 test for significant differences between both coefficients ( $P[C. nigoni/C. briggsae] = ASE[C.$   
714 *nigoni/C. briggsae*). *P* values were considered significant after a 5% FDR analysis (95).

715  
716 We inferred the influence of *cis*- and *trans*-regulatory divergence on genes linked to autosomes,  
717 as well as to the X-chromosome in females, following the criteria in McManus et al. (16). This  
718 procedure allowed us to designate genes having undergone significant regulatory divergence  
719 due to ***cis*-only**, ***trans*-only**, and **compensatory *cis-trans*** effects. Genes with either significant  
720 synergistic (*cis* + *trans*) or antagonistic (*cis* x *trans*) *cis-trans* effects were grouped together as  
721 representing changes with **enhancing *cis-trans*** effects. Genes expressed with no significant  
722 differences between parents, ASE, or *trans* effects were deemed as **conserved** and those that  
723 did not strictly fit into any of the previous groups were considered **ambiguous**.

724  
725 Given the hemizygous condition of the X-chromosome in males, we cannot use  $F_1$  ASE of X-  
726 linked genes in males to assess *cis* and *trans* regulatory divergence. However, we devised a  
727 scheme to assign different types of regulatory divergence to X-linked genes given differences in  
728 expression between male  $F_1$  hybrids and parent species (Supplementary Fig. S3; Wayne et al.  
729 2004). Given that  $F_1$  males' X-chromosome derives solely from their maternal *C. nigoni*, X-linked  
730 genes that differ in expression between the parental species and showing *C. nigoni* dominant  
731 expression in hybrid males were considered as having significant *cis*-only effects, as differences  
732 in the *C. briggsae trans* autosomal environment did not lead to significant deviations from *C.*  
733 *nigoni* expression. Alternatively, X-linked genes in hybrid males found to be *C. briggsae*  
734 dominant reflect significant *trans*-only effects. This implies two things: 1) that X-linked *cis*  
735 elements in *C. nigoni* are not sufficiently different from their counterparts in *C. briggsae* to  
736 prevent *C. briggsae trans* regulators from acting on them; and 2) that *C. nigoni trans*-regulators  
737 on those pathways are potentially recessive. Supporting this assignment scheme, X-linked  
738 genes with *cis*-only effects on regulatory divergence have significantly higher rates of molecular

739 evolution compared to genes with *trans*-only effects (Supplementary Fig. S2; ordinary linear  
740 regression  $P$  value = 0.05 for  $K_a/K_s$  and  $P$  value < 0.05 for the proportion of conserved 5 bp  
741 windows 500 bp upstream). Consequently, we inferred compensatory *cis-trans* effects for X-  
742 linked genes in males where expression was not significantly different between parent species,  
743 but significantly different from  $F_1$  hybrid males. Lastly, we inferred significant enhancing *cis-*  
744 *trans* effects for those X-linked genes with intermediate (additive) expression in  $F_1$ s, or with  
745 significant differential expression between parent species coupled to significantly higher or  
746 lower expression in  $F_1$ s than in both parent species (Supplementary Fig. S3; (26)).

747

748 Molecular evolution in coding sequences

749 Orthologs in the genomes of both *C. briggsae* and *C. nigoni* were first aligned as protein coding  
750 sequences using MAFFT v7.407 (96). These alignments were then back-translated to coding  
751 sequence (CDS) alignments using the python program CODONALIGN  
752 (<https://github.com/santiagosnchez/CodonAlign>). We estimated rates of synonymous site ( $K_s$ )  
753 and non-synonymous site divergence ( $K_a$ ) between the two aligned sequences using a custom  
754 Python script (<https://github.com/santiagosnchez/DistKnKs>) applying the Yang and Nielsen  
755 (2000) model implemented in BioPython (Cock et al. 2009). We also corrected  $K_s$  values for  
756 selection on codon usage using the effective number of codons (ENC; (97,98)) as a predictor in  
757 a linear model. In short, we fitted a linear regression model ( $K_s \sim \text{ENC}$ ), which we used to predict  
758  $K_s$  at the maximum value of ENC (=60). Then, we corrected the bias in  $K_s$  by adding the residuals  
759 of the linear model to that idealized value of  $K_s$  at ENC = 60. We refer to these corrected set of  
760  $K_s$  estimates as  $K_s'$ .

761

762 Upstream non-coding sequence conservation

763 Chromosome-level FASTA sequences for *C. briggsae* and *C. nigoni* were aligned using LASTZ (99),  
764 outputting alignment files for each chromosome in MAF format. We used BEDTOOLS's v2.27 (100)  
765 *flank* function to generate 500 bp intervals of the 5' upstream flanking regions of each  
766 orthologous gene. We then used *maf\_parse* from PHAST (101) to extract overlapping alignment

767 blocks of at least 500 bp long. We quantified sequence conservation as the average number of  
768 identical 5 bp non-overlapping windows between aligned DNA in both sequences.

769

770 Spermatogenesis genes

771 To infer genes involved with spermatogenesis, we downloaded a list *C. elegans* genes  
772 previously identified as spermatogenesis based on tissue-specific transcript abundance (42)  
773 ([Additional File 4](#)). We then used the BioMart tool of the WormBase Parasite website (102) to  
774 retrieve *C. briggsae* orthologs from the list of *C. elegans* genes. We cross-referenced *C. briggsae*  
775 orthologs to our own set of orthologs between *C. briggsae* and *C. nigoni* and annotated the  
776 1,089 gene matches with a spermatogenesis tag.

777

778 Data availability

779 Raw sequencing data is to be submitted to Short Read Archive upon acceptance under XXXXXX  
780 accession number. Raw gene count data will be submitted to Gene Expression Omnibus. Scripts  
781 detailing bioinformatic and analytical procedures will be hosted on GitHub  
782 (<https://github.com/santiagosnchez>).

783

## 784 Acknowledgements

785 We thank Katja Kasimatis and Karl Grieshop for comments on previous versions of the  
786 manuscript. Computations were performed on the Niagara supercomputer at the SciNet HPC  
787 Consortium. SciNet is funded by the Canada Foundation for Innovation, the Government of  
788 Ontario, the Ontario Research Fund - Research Excellence, and the University of Toronto. S.S.R.  
789 is supported by an EEB Departmental Postdoctoral Fellowship. A.D.C. is supported by a  
790 Discovery Grant from the Natural Sciences and Engineering Research Council of Canada.  
791

## 792 References

- 793 1. Coyne JA, Orr HA. Speciation. Sinauer Associates Incorporated: Sinauer Associates  
794 Incorporated; 2004.
- 795 2. Rundle HD, Nosil P. Ecological speciation. *Ecol Lett.* 2005;8(3):336–52.
- 796 3. Orr HA. The population genetics of speciation: the evolution of hybrid incompatibilities.  
797 *Genetics.* 1995;139(4):1805–13.
- 798 4. Gordon KL, Ruvinsky I. Tempo and mode in evolution of transcriptional regulation. *PLoS*  
799 *Genet.* 2012;8(1):e1002432.
- 800 5. Mack KL, Nachman MW. Gene regulation and speciation. *Trends Genet.* 2017;33(1):68–  
801 80.
- 802 6. Ortiz-Barrientos D, Counterman BA, Noor MAF. Gene expression divergence and the  
803 origin of hybrid dysfunctions. *Genetica.* 2006;129(1):71–81.
- 804 7. Lemos B, Meiklejohn CD, Cáceres M, Hartl DL. Rates of divergence in gene expression  
805 profiles of primates, mice, and flies: stabilizing selection and variability among functional  
806 categories. *Evolution.* 2005;59(1):126–37.
- 807 8. Denver DR, Morris K, Strelman JT, Kim SK, Lynch M, Thomas WK. The transcriptional  
808 consequences of mutation and natural selection in *Caenorhabditis elegans*. *Nat Genet.*  
809 2005;37(5):544–8.
- 810 9. Rifkin SA, Houle D, Kim J, White KP. A mutation accumulation assay reveals a broad  
811 capacity for rapid evolution of gene expression. *Nature.* 2005;438(7065):220–3.
- 812 10. Gilad Y, Oshlack A, Rifkin SA. Natural selection on gene expression. *Trends Genet.*  
813 2006;22(8):456–61.
- 814 11. Signor SA, Nuzhdin S V. The evolution of gene expression in *cis* and *trans*. *Trends Genet.*  
815 2018;34(7):532–44.
- 816 12. Bedford T, Hartl DL. Optimization of gene expression by natural selection. *Proc Natl Acad*  
817 *Sci U S A.* 2009;106(4):1133–8.
- 818 13. Wray GA. The evolutionary significance of *cis*-regulatory mutations. *Nat Rev Genet.*  
819 2007;8(3):206–16.
- 820 14. Stern DL, Orgogozo V. The loci of evolution: how predictable is genetic evolution?  
821 *Evolution.* 2008;62(9):2155–77.
- 822 15. Wittkopp PJ. Genomic sources of regulatory variation in *cis* and in *trans*. *Cell Mol Life Sci.*  
823 2005;62(16):1779–83.
- 824 16. McManus CJ, Coolon JD, Duff MO, Eipper-Mains J, Graveley BR, Wittkopp PJ. Regulatory  
825 divergence in *Drosophila* revealed by mRNA-seq. *Genome Res.* 2010;20(6):816–25.
- 826 17. Shi X, Ng DW-K, Zhang C, Comai L, Ye W, Chen ZJ. *cis*- and *trans*-regulatory divergence  
827 between progenitor species determines gene-expression novelty in *Arabidopsis*  
828 allopolyploids. *Nat Commun.* 2012;3(1):950–9.
- 829 18. Bell GDM, Kane NC, Rieseberg LH, Adams KL. RNA-seq analysis of allele-specific  
830 expression, hybrid effects, and regulatory divergence in hybrids compared with their  
831 parents from natural populations. *Genome Biol Evol.* 2013;5(7):1309–23.
- 832 19. Tirosh I, Reikhav S, Levy AA, Barkai N. A yeast hybrid provides insight into the evolution  
833 of gene expression regulation. *Science.* 2009;324(5927):659–62.
- 834 20. Barrière A, Gordon KL, Ruvinsky I. Coevolution within and between regulatory loci can



- 835 preserve promoter function despite evolutionary rate acceleration. *PLoS Genet.*  
836 2012;8(9):e1002961-13.
- 837 21. Landry CR, Wittkopp PJ, Taubes CH, Ranz JM, Clark AG, Hartl DL. Compensatory *cis-trans*  
838 evolution and the dysregulation of gene expression in interspecific hybrids of *Drosophila*.  
839 *Genetics.* 2005;171(4):1813–22.
- 840 22. Wittkopp PJ, Haerum BK, Clark AG. Evolutionary changes in *cis* and *trans* gene regulation.  
841 *Nature.* 2004;430(6995):85–8.
- 842 23. Wittkopp PJ, Haerum BK, Clark AG. Regulatory changes underlying expression differences  
843 within and between *Drosophila* species. *Nat Genet.* 2008;40(3):346–50.
- 844 24. Mack KL, Campbell P, Nachman MW. Gene regulation and speciation in house mice.  
845 *Genome Res.* 2016;26(4):451–61.
- 846 25. Emerson JJ, Hsieh LC, Sung HM, Wang TY, Huang CJ, Lu HHS, et al. Natural selection on *cis*  
847 and *trans* regulation in yeasts. *Genome Res.* 2010;20(6):826–36.
- 848 26. Wayne ML, Pan YJ, Nuzhdin S V, McIntyre LM. Additivity and *trans*-acting effects on gene  
849 expression in male *Drosophila simulans*. *Genetics.* 2004;168(3):1413–20.
- 850 27. Turner LM, White MA, Tautz D, Payseur BA. Genomic networks of hybrid sterility. *PLoS*  
851 *Genet.* 2014;10(2):e1004162-23.
- 852 28. Gomes S, Civetta A. Hybrid male sterility and genome- wide misexpression of male  
853 reproductive proteases. *Sci Rep.* 2015;5(1):1–11.
- 854 29. Li R, Ren X, Bi Y, Ho VWS, Hsieh C-L, Young A, et al. Specific down-regulation of  
855 spermatogenesis genes targeted by 22G RNAs in hybrid sterile males associated with an  
856 X-Chromosome introgression. *Genome Res.* 2016;26(9):1219–32.
- 857 30. Turelli M, Orr HA. The dominance theory of Haldane’s rule. *Genetics.* 1995;140(1):389–  
858 402.
- 859 31. Wu CI, Davis AW. Evolution of postmating reproductive isolation: the composite nature  
860 of Haldane’s rule and its genetic bases. *Am Nat.* 1993;142(2):187–212.
- 861 32. Charlesworth B, Coyne JA, Barton NH. The relative rates of evolution of sex  
862 chromosomes and autosomes. *Am Nat.* 1987;130(1):113–46.
- 863 33. Delph LF, Demuth JP. Haldane’s rule: genetic bases and their empirical support. *J Hered.*  
864 2016;107(5):383–91.
- 865 34. Cutter AD. X exceptionalism in *Caenorhabditis* speciation. *Mol Ecol.* 2018;27(19):3925–  
866 34.
- 867 35. Masly JP, Presgraves DC. High-resolution genome-wide dissection of the two rules of  
868 speciation in *Drosophila*. *PLoS Biol.* 2007;5(9):1890–8.
- 869 36. Koevoets T, Beukeboom LW. Genetics of postzygotic isolation and Haldane’s rule in  
870 haplodiploids. *Heredity.* 2008;102(1):16–23.
- 871 37. Presgraves DC. Evaluating genomic signatures of “the large X-effect” during complex  
872 speciation. *Mol Ecol.* 2018;27(19):3822–30.
- 873 38. Llopart A. The rapid evolution of X-linked male-biased gene expression and the large-X  
874 effect in *Drosophila yakuba*, *D. santomea*, and their hybrids. *Mol Biol Evol.*  
875 2012;29(12):3873–86.
- 876 39. Meisel RP, Malone JH, Clark AG. Faster-X evolution of gene expression in *Drosophila*.  
877 *PLoS Genet.* 2012;8(10):e1003013.
- 878 40. Reinke V, Gil IS, Ward S, Kazmer K. Genome-wide germline-enriched and sex-biased

- 879 expression profiles in *Caenorhabditis elegans*. *Development*. 2004;131(2):311–23.
- 880 41. Ortiz MA, Noble D, Sorokin EP, Kimble J. A new dataset of spermatogenic vs. oogenic  
881 transcriptomes in the nematode *Caenorhabditis elegans*. *G3*. 2014;4(9):1765–72.
- 882 42. Ma X, Zhu Y, Li C, Xue P, Zhao Y, Chen S, et al. Characterisation of *Caenorhabditis elegans*  
883 sperm transcriptome and proteome. *BMC Genomics*. 2014;15(1):1–13.
- 884 43. Baird SE, Seibert SR. Reproductive isolation in the Elegans-Group of *Caenorhabditis*. *Nat*  
885 *Sci*. 2013;05(04):18–25.
- 886 44. Félix M-A, Braendle C, Cutter AD. A streamlined system for species diagnosis in  
887 *Caenorhabditis* (Nematoda: Rhabditidae) with name designations for 15 distinct  
888 biological species. *PLoS One*. 2014;9(4):e94723-9.
- 889 45. Thomas CG, Wang W, Jovelín R, Ghosh R, Lomasko T, Trinh Q, et al. Full-genome  
890 evolutionary histories of selfing, splitting, and selection in *Caenorhabditis*. *Genome Res*.  
891 2015;25(5):667–78.
- 892 46. Woodruff GC, Eke O, Baird SE, Félix M-A, Haag ES. Insights into species divergence and  
893 the evolution of hermaphroditism from fertile interspecies hybrids of *Caenorhabditis*  
894 nematodes. *Genetics*. 2010;186(3):997–1012.
- 895 47. Kozłowska JL, Ahmad AR, Jahesh E, Cutter AD. Genetic variation for postzygotic  
896 reproductive isolation between *Caenorhabditis briggsae* and *Caenorhabditis* sp. 9.  
897 *Evolution*. 2011;66(4):1180–95.
- 898 48. Bundus JD, Alaei R, Cutter AD. Gametic selection, developmental trajectories, and  
899 extrinsic heterogeneity in Haldane’s rule. *Evolution*. 2015;69(8):2005–17.
- 900 49. Thomas CG, Li R, Smith HE, Woodruff GC, Oliver B, Haag ES. Simplification and  
901 desexualization of gene expression in self-fertile nematodes. *Curr Biol*.  
902 2012;22(22):2167–72.
- 903 50. Fierst JL, Willis JH, Thomas CG, Wang W, Reynolds RM, Ahearne TE, et al. Reproductive  
904 mode and the evolution of genome size and structure in *Caenorhabditis* nematodes.  
905 *PLoS Genet*. 2015;11(6):e1005323-25.
- 906 51. Yin D, Schwarz EM, Thomas CG, Felde RL, Korf IF, Cutter AD, et al. Rapid genome  
907 shrinkage in a self-fertile nematode reveals sperm competition proteins. *Science*.  
908 2018;359(6371):55–61.
- 909 52. Bi Y, Ren X, Yan C, Shao J, Xie D, Zhao Z. A genome-wide hybrid incompatibility landscape  
910 between *Caenorhabditis briggsae* and *C. nigoni*. *PLoS Genet*. 2015;11(2):e1004993-26.
- 911 53. Bi Y, Ren X, Li R, Ding Q, Xie D, Zhao Z. Specific interactions between autosome and X-  
912 chromosomes cause hybrid male sterility in *Caenorhabditis* species. *Genetics*.  
913 2019;212(3):801–13.
- 914 54. Renaut S, Nolte AW, Bernatchez L. Gene expression divergence and hybrid misexpression  
915 between lake whitefish species pairs *Coregonus* spp. (Salmonidae). *Mol Biol Evol*.  
916 2009;26(4):925–36.
- 917 55. Meiklejohn CD, Coolon JD, Hartl DL, Wittkopp PJ. The roles of *cis*- and *trans*-regulation in  
918 the evolution of regulatory incompatibilities and sexually dimorphic gene expression.  
919 *Genome Res*. 2014;24(1):84–95.
- 920 56. Gibson G, Weir B. The quantitative genetics of transcription. *Trends Genet*.  
921 2005;21(11):616–23.
- 922 57. Kasimatis KR, Nelson TC, Phillips PC. Genomic signatures of sexual conflict. *J Hered*.

- 923 2017;108(7):780–90.
- 924 58. Rowe L, Chenoweth SF, Agrawal AF. The genomics of sexual conflict. *Am Nat.*  
925 2018;192(2):274–86.
- 926 59. Barrière A, Gordon KL, Ruvinsky I. Coevolution within and between regulatory loci can  
927 preserve promoter function despite evolutionary rate acceleration . *PLoS Genet.*  
928 2012;8(9):e1002961-13.
- 929 60. True JR, Haag ES. Developmental system drift and flexibility in evolutionary trajectories.  
930 *Evol Dev.* 2001;3(2):109–19.
- 931 61. Verster AJ, Ramani AK, McKay SJ, Fraser AG. Comparative RNAi screens in *C. elegans* and  
932 *C. briggsae* reveal the impact of developmental system drift on gene function. *PLoS*  
933 *Genet.* 2014;10(2):e1004077-15.
- 934 62. Kiontke K, Barrière A, Kolotuev I, Podbilewicz B, Sommer R, Fitch DHA, et al. Trends,  
935 stasis, and drift in the evolution of nematode vulva development. *Curr Biol.*  
936 2007;17(22):1925–37.
- 937 63. Cutter AD. Divergence times in *Caenorhabditis* and *Drosophila* inferred from direct  
938 estimates of the neutral mutation rate. *Mol Biol Evol.* 2008;25(4):778–86.
- 939 64. Woodruff GC, Willis JH, Phillips PC. Dramatic evolution of body length due to  
940 postembryonic changes in cell size in a newly discovered close relative of *Caenorhabditis*  
941 *elegans*. *Evol Lett.* 2018;2(4):427–41.
- 942 65. Mallard F, Noble L, Guzella T, Afonso B, Baer CF, Teotónio H. Selection and drift  
943 determine phenotypic stasis despite genetic divergence. 2019;
- 944 66. Barrière A, Ruvinsky I. Pervasive divergence of transcriptional gene regulation in  
945 *Caenorhabditis* nematodes. *PLoS Genet.* 2014;10(6):e1004435-15.
- 946 67. Barkoulas M, Vargas Velazquez AM, Peluffo AE, Félix M-A. Evolution of new cis-  
947 regulatory motifs required for cell-specific gene expression in *Caenorhabditis*. *PLoS*  
948 *Genet.* 2016;12(9):e1006278-23.
- 949 68. Civetta A. Misregulation of gene expression and sterility in interspecies hybrids: causal  
950 links and alternative hypotheses. *J Mol Evol.* 2016;82(4):176–82.
- 951 69. Merritt C, Rasoloson D, Ko D, Seydoux G. 3'UTRs are the primary regulators of gene  
952 expression in the *C. elegans* germline. *Curr Biol.* 2008;18(19):1476–82.
- 953 70. Lamont LB, Kimble J. Developmental expression of FOG-1/CPEB protein and its control in  
954 the *Caenorhabditis elegans* hermaphrodite germ line. *Dev Dyn.* 2007;236(3):871–9.
- 955 71. Rice WR. Sex chromosomes and the evolution of sexual dimorphism. *Evolution.*  
956 1984;38(4):735–42.
- 957 72. Cutter AD. Reproductive transitions in plants and animals: selfing syndrome, sexual  
958 selection and speciation. *New Phytol.* 2019;224(3):1080–94.
- 959 73. Coolon JD, Webb W, Wittkopp PJ. Sex-specific effects of cis-regulatory variants in  
960 *Drosophila melanogaster*. *Genetics.* 2013;195(4):1419–22.
- 961 74. Graze RM, McIntyre LM, Morse AM, Boyd BM, Nuzhdin S V, Wayne ML. What the X has  
962 to do with it: differences in regulatory variability between the sexes in *Drosophila*  
963 *simulans*. *Genome Biol Evol.* 2014;6(4):818–29.
- 964 75. Cutter AD, Ward S. Sexual and temporal dynamics of molecular evolution in *C. elegans*  
965 development. *Mol Biol Evol.* 2005;22(1):178–88.
- 966 76. Artieri CG, Haerty W, Gupta BP, Singh RS. Sexual selection and maintenance of sex:

- 967 evidence from comparisons of rates of genomic accumulation of mutations and  
968 divergence of sex-related genes in sexual and hermaphroditic species of *Caenorhabditis*.  
969 Mol Biol Evol. 2008;25(5):972–9.
- 970 77. Cutter AD, Morran LT, Phillips PC. Males, outcrossing, and sexual selection in  
971 *Caenorhabditis* nematodes. Genetics. 2019;213(1):27–57.
- 972 78. Stocks M, Dean R, Rogell B, Friberg U. Sex-specific trans-regulatory variation on the  
973 *Drosophila melanogaster* X chromosome. PLoS Genet. 2015;11(2):e1005015-19.
- 974 79. Barton NH. The reduction in fixation probability caused by substitutions at linked loci.  
975 Genet Res. 1994;64(3):199–208.
- 976 80. Cutter AD, Choi JY. Natural selection shapes nucleotide polymorphism across the genome  
977 of the nematode *Caenorhabditis briggsae*. Genome Res. 2010;20(8):1103–11.
- 978 81. Castillo-Davis CI, Hartl DL, Achaz G. cis-regulatory and protein evolution in orthologous  
979 and duplicate genes. Genome Res. 2004;14(8):1530–6.
- 980 82. Tirosh I, Barkai N. Evolution of gene sequence and gene expression are not correlated in  
981 yeast. Trends Genet. 2008;24(3):109–13.
- 982 83. Bolger AM, Lohse M, Usadel B. Trimmomatic: A flexible trimmer for Illumina sequence  
983 data. Bioinformatics. 2014;30(15):2114–20.
- 984 84. Dobin A, Davis CA, Schlesinger F, Drenkow J, Zaleski C, Jha S, et al. STAR: ultrafast  
985 universal RNA-seq aligner. Bioinformatics. 2012;29(1):15–21.
- 986 85. Stevenson KR, Coolon JD, Wittkopp PJ. Sources of bias in measures of allele-specific  
987 expression derived from RNA-seq data aligned to a single reference genome. BMC  
988 Genomics. 2013;14(1):513–36.
- 989 86. Fang G, Bhardwaj N, Robilotto R, Gerstein MB. Getting started in gene orthology and  
990 functional analysis. PLOS Comput Biol. 2010;6(3):e1000703-8.
- 991 87. Emms DM, Kelly S. OrthoFinder: solving fundamental biases in whole genome  
992 comparisons dramatically improves orthogroup inference accuracy. Genome Biol.  
993 2015;16:157.
- 994 88. Stevens L, Félix M-A, Beltran T, Braendle C, Caurcel C, Fausett S, et al. Comparative  
995 genomics of 10 new *Caenorhabditis* species. Evol Lett. 2019;3(2):217–36.
- 996 89. Anders S, Pyl PT, Huber W. HTSeq—a Python framework to work with high-throughput  
997 sequencing data. Bioinformatics. 2015;31(2):166–9.
- 998 90. R Core Team. R: A Language and Environment for Statistical Computing. R Foundation for  
999 Statistical Computing: R Foundation for Statistical Computing; 2019.
- 1000 91. Ritchie ME, Phipson B, Wu D, Hu Y, Law CW, Shi W, et al. limma powers differential  
1001 expression analyses for RNA-sequencing and microarray studies. Nucleic Acids Res.  
1002 2015;43(7):e47–e47.
- 1003 92. Robinson MD, McCarthy DJ, Smyth GK. *edgeR*: a Bioconductor package for differential  
1004 expression analysis of digital gene expression data. Bioinformatics. 2009;26(1):139–40.
- 1005 93. Chen Y, Lun ATL, Smyth GK. From reads to genes to pathways: differential expression  
1006 analysis of RNA-Seq experiments using Rsubread and the edgeR quasi-likelihood pipeline.  
1007 F1000Research. 2016;5:1438–49.
- 1008 94. Law CW, Chen Y, Shi W, Smyth GK. voom: precision weights unlock linear model analysis  
1009 tools for RNA-seq read counts. Genome Biol. 2014;15(2):R29.
- 1010 95. Benjamini Y, Hochberg Y. Controlling the false discovery rate: a practical and powerful

- 1011 approach to multiple testing. *J R Stat Soc Ser B*. 1995;57(1):289–300.
- 1012 96. Katoh K. MAFFT version 5: improvement in accuracy of multiple sequence alignment.
- 1013 *Nucleic Acids Res*. 2005;33(2):511–8.
- 1014 97. Wright F. The “effective number of codons” used in a gene. *Gene*. 1990;87(1):23–9.
- 1015 98. Fuglsang A. The “effective number of codons” revisited. *Biochem Biophys Res Commun*.
- 1016 2004;317(3):957–64.
- 1017 99. Harris RS. Improved pairwise alignment of genomic DNA. [Ph.D. Thesis, Pennsylvania
- 1018 State University]: Ph.D. Thesis, Pennsylvania State University; 1997.
- 1019 100. Quinlan AR, Hall IM. BEDTools: a flexible suite of utilities for comparing genomic
- 1020 features. *Bioinformatics*. 2010;26(6):841–2.
- 1021 101. Hubisz MJ, Pollard KS, Siepel A. PHAST and RPHAST: phylogenetic analysis with
- 1022 space/time models. *Brief Bioinform*. 2011;12(1):41–51.
- 1023 102. Howe KL, Bolt BJ, Shafie M, Kersey P, Berriman M. WormBase ParaSite – a
- 1024 comprehensive resource for helminth genomics. *Mol Biochem Parasitol*. 2017;215:2–10.
- 1025

1026 **Figures**

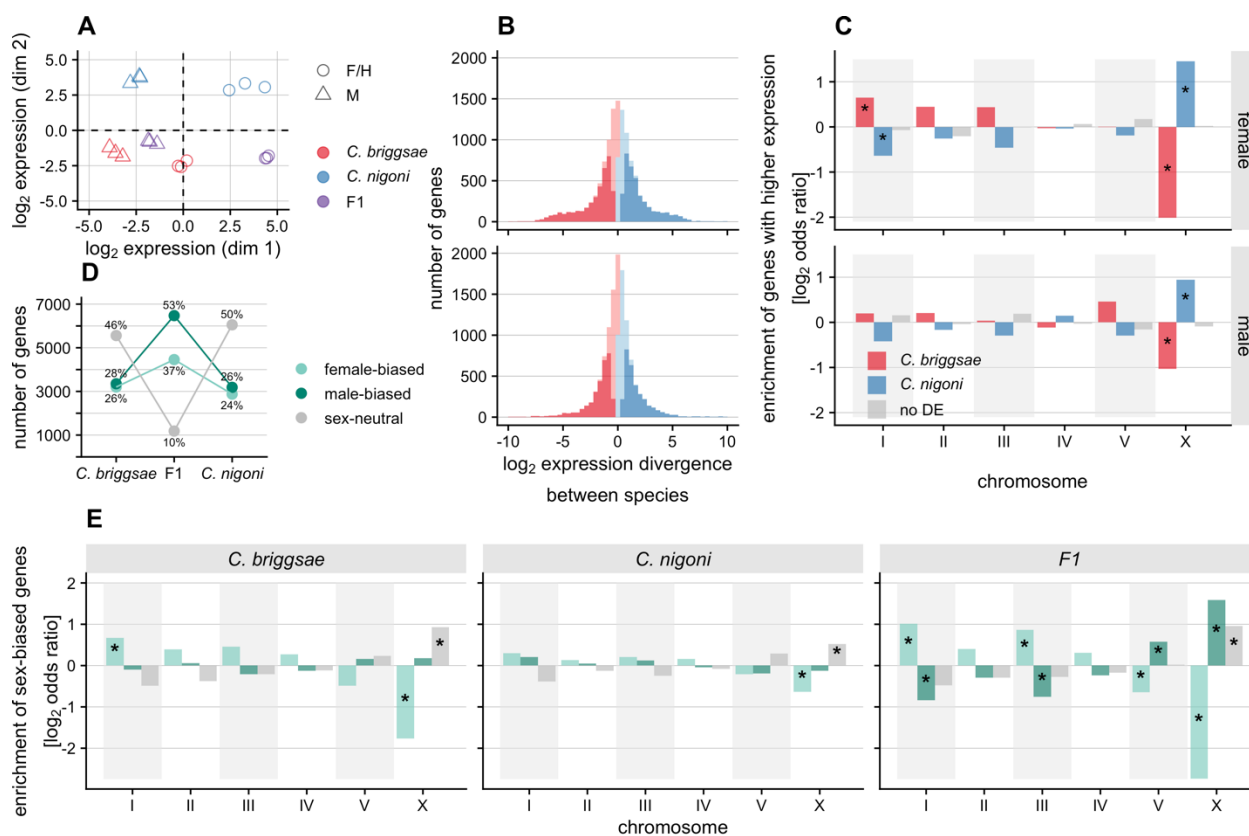

1027  
 1028 **Figure 1. Incidences of differentially expressed genes for 12,115 orthologs between species**  
 1029 **and sexes. (A)** Non-metric multidimensional scaling (MDS) plot showing log<sub>2</sub> expression  
 1030 distances between samples. Sexes and species are well separated in expression space and  
 1031 hybrids present considerable distance from parental transcriptomic profiles (*C. nigoni* and  
 1032 hybrid female, F; *C. briggsae* hermaphrodite; male, M). **(B)** Histogram of log<sub>2</sub> expression  
 1033 divergence (*C. nigoni*/*C. briggsae*) for female (top panel) and male transcriptomes (bottom  
 1034 panel). **(C)** Enrichment of differentially expressed genes between species for females and males  
 1035 (log<sub>2</sub> odds ratio, i.e. observed/expected). Asterisks mark significant enrichments (positive  
 1036 values) or depletions (negative values) on chromosomes (*P* value < 0.05 and |log<sub>2</sub> odds ratio| >  
 1037 0.5). On the legend, "no DE" denotes genes that are not significantly differentially expressed.  
 1038 **(D)** Number and percentage of genes that show significant sex-bias is greater in F<sub>1</sub> hybrids than  
 1039 parent species. **(E)** Enrichment of genes with significant sex-bias and sex-neutrality in parent  
 1040 species and F<sub>1</sub> hybrids for each chromosome. Same legend as D and asterisks denote same  
 1041 statistics as C.  
 1042

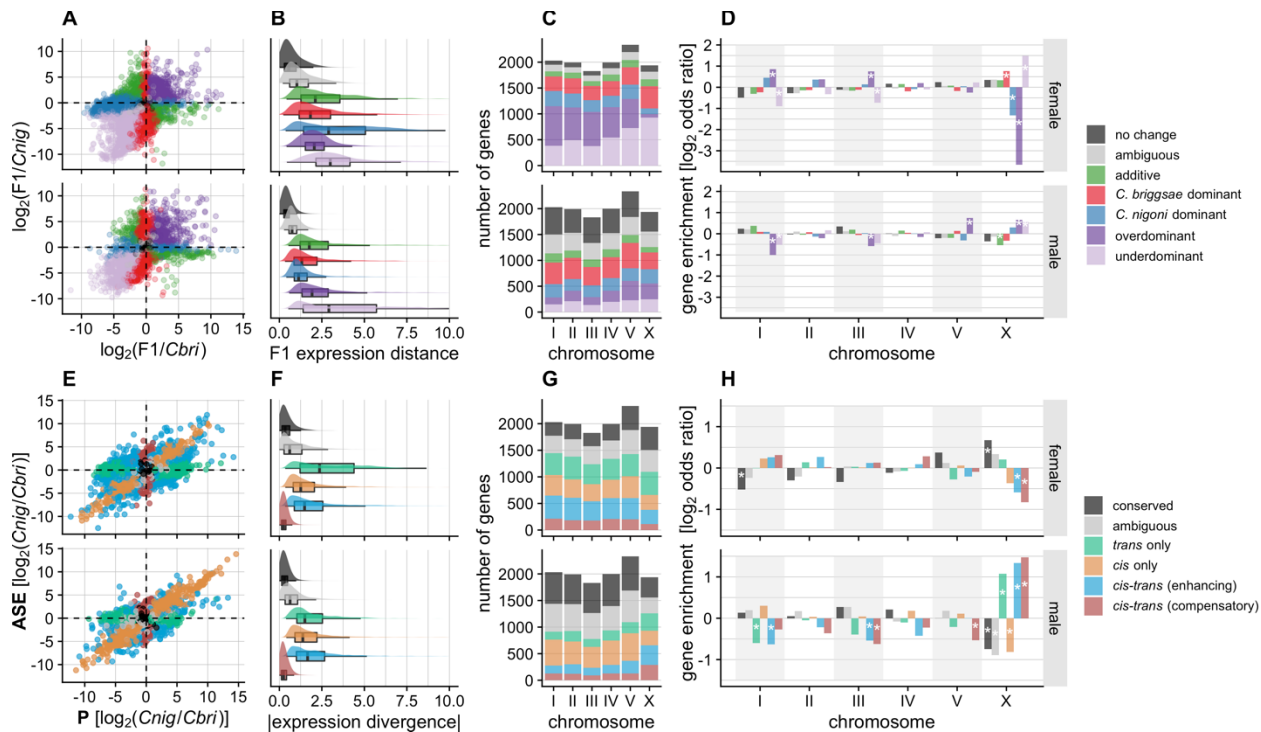

1043  
1044

1045 **Figure 2. Sex-specific differences in expression divergence and regulatory changes identify**  
 1046 **expression inheritance profiles between species. (A)** Per-gene biplot of  $\log_2$  expression  
 1047 differences between  $F_1$ s and each parent species. **(B)** Box- and density plots of expression  
 1048 distance from the origin or centroid of  $F_1$  hybrids for genes within a given expression  
 1049 inheritance category (see Materials and Methods). **(C)** Stacked barplot of gene counts in each  
 1050 expression inheritance group for each chromosome. **(D)** Per-chromosome enrichment ( $\log_2$   
 1051 odds ratio, i.e. observed/expected) of genes in a given expression inheritance group. Asterisks  
 1052 mark significant enrichments (positive values) or depletions (negative values) on chromosomes  
 1053 ( $P$  value < 0.05 and  $|\log_2$  odds ratio| > 0.5). **(E)** Biplot of expression divergence between species  
 1054 (x-axis) versus allele-specific expression (ASE) in hybrids that indicates the magnitude *cis*-acting  
 1055 expression difference between alleles (y-axis). **(F)** Box- and density plots of the magnitude of  
 1056 absolute expression divergence between species for each type of *cis* and *trans* regulatory  
 1057 changes. **(G)** and **(H)** as for C and D, but indicating different types of *cis* and *trans* regulatory-  
 1058 change profiles. In F, G, and H, X-linked genes in males followed the classification scheme  
 1059 described in the Methods section and in Supplementary Fig. S3. Colors indicate different groups  
 1060 of genes with different expression inheritance (see legend for A-D) and *cis* and *trans* regulatory  
 1061 changes (see legend for E-H). Top panels in each of A-H correspond to female transcriptomes,  
 1062 bottom panels to male transcriptomes.).

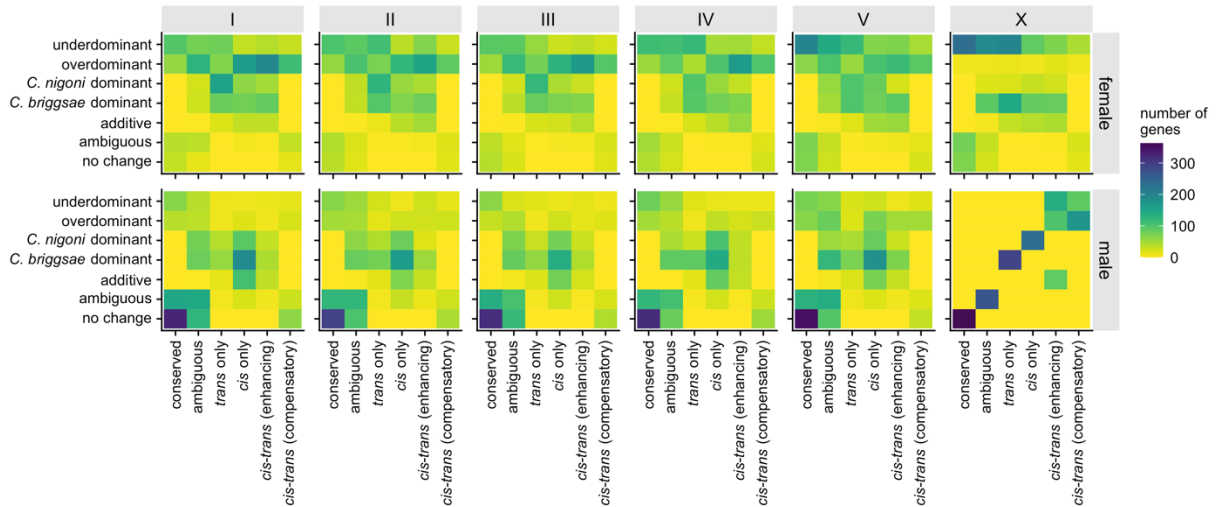

1063  
1064  
1065  
1066  
1067  
1068  
1069  
1070

**Figure 3. X-autosome differences in regulatory controls between sexes underlie hybrid transcriptomic profiles relative to parent species.** Heatmap of the number of genes in each expression inheritance group (y-axis) for each type of *cis* and *trans* regulatory changes (x-axis) for each chromosome (I-V, X) and each sex. X-linked genes in males followed the classification scheme described in the Methods section and in Supplementary Fig. S3.



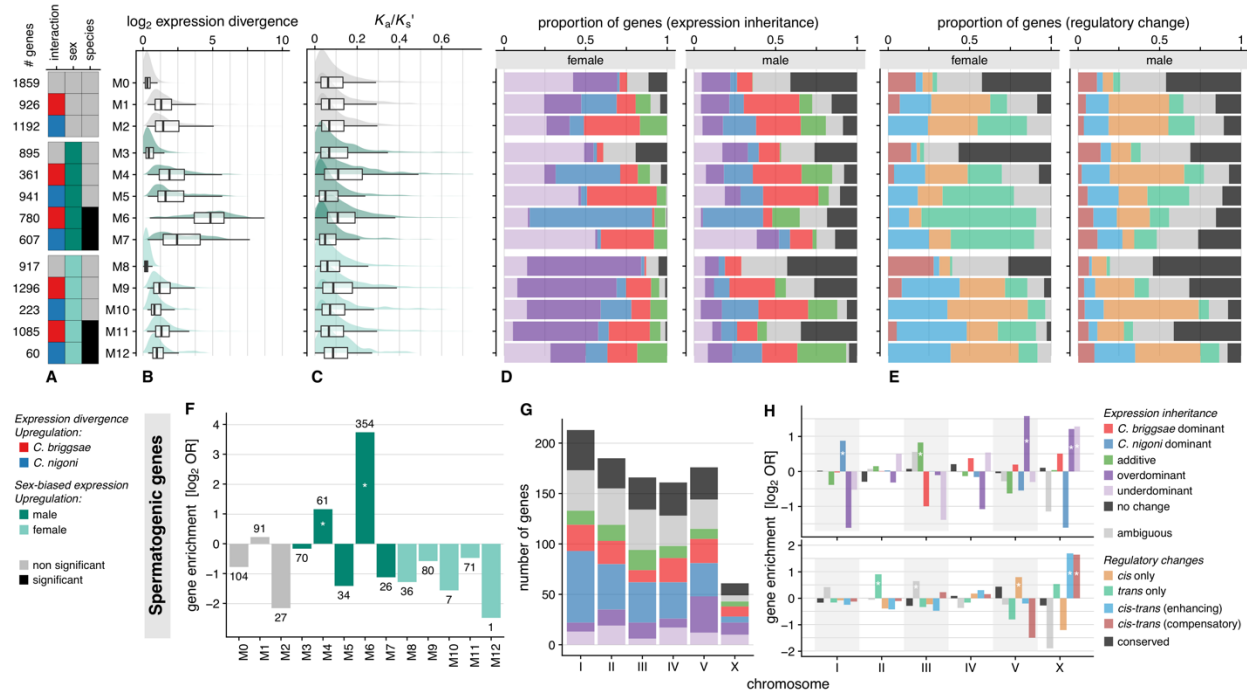

1071  
 1072 **Figure 4. Male-biased and spermatogenesis genes show higher expression divergence,**  
 1073 **molecular evolution, and sex-specific regulatory divergence.** (A) Thirteen distinct species-by-  
 1074 sex gene expression gene groups (M0-M12). Columns indicate significant expression divergence  
 1075 due to species (*C. briggsae* higher expression in red, *C. nigoni* in blue), sex (male dark green,  
 1076 female or hermaphrodite light green), or species-by-sex interaction (black); gray indicates no  
 1077 significant differential expression. (B) Absolute expression divergence and (C) protein sequence  
 1078 divergence ( $K_a/K_s'$ ) differs across the M0-M12 species-by-sex profiles. (D) Species  
 1079 Proportion of genes within each species-by-sex gene groups differ in the relative representation of expression  
 1080 inheritance categories and (E) types of *cis*- and *trans*-regulatory divergence, distinctly for  
 1081 females (left panels) and males (right panels). (F) Spermatogenesis genes are significantly  
 1082 enriched in male-biased gene groups M4 and M6 (orthologs of *C. elegans* genes in Ma et al.  
 1083 2014; see Methods;  $P$  value < 0.05 and  $|\log_2$  odds ratio| > 0.5). (G) Spermatogenesis genes are  
 1084 rare on the X, with *C. nigoni* expression dominance in  $F_1$ s disproportionately common on  
 1085 autosomes. (H) Misexpressed and misregulated spermatogenesis genes are significantly  
 1086 enriched in the X chromosome.  
 1087  
 1088

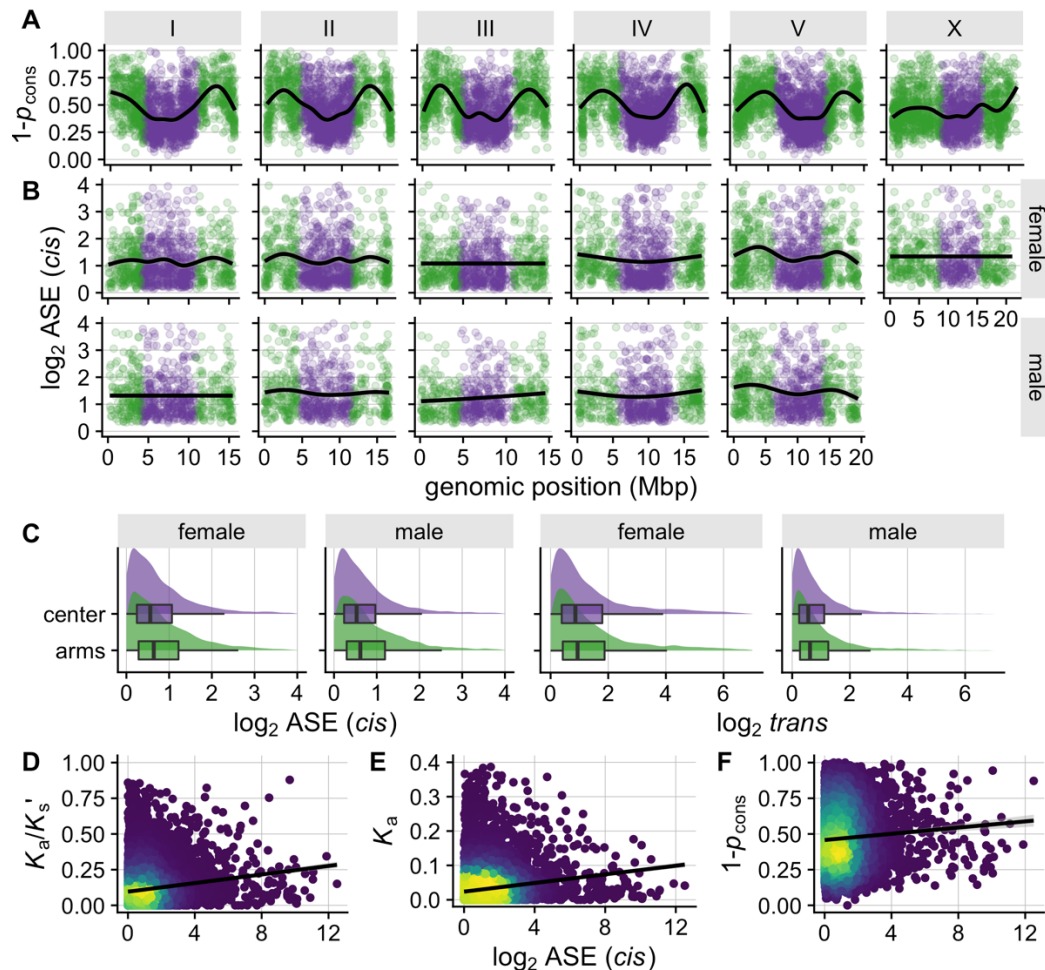

1089  
 1090 **Figure 5. Chromosomal arm (green) and center (purple) regions differ strongly in (A) upstream**  
 1091 **sequence divergence ( $1-P_{cons}$ ; 5 bp windows within 500 bp upstream of each gene) but only**  
 1092 **moderately in (B) *cis*-regulatory divergence ( $\log_2$  allele-specific expression, ASE; females on**  
 1093 **top). (A) Proportion of non-conserved 5 bp windows within 500 bp upstream of each gene ( $1-$**   
 1094  **$P_{cons}$ ) for each chromosome. (B) Absolute magnitude of  $\log_2$  allele-specific expression or *cis*-**  
 1095 **regulatory divergence for each chromosome in females and for autosomes only in males. Arms**  
 1096 **and centers are colored with green and purple colors, respectively. Black lines indicate general**  
 1097 **additive regression (GAM) trendlines. (C) Arm and center regions do not differ greatly in**  
 1098 **magnitude of either box- and density plots of total (absolute) *cis*-regulatory divergence (left**  
 1099 **two panels) or *trans* regulatory divergence (right two panels) for either male or female gene**  
 1100 **expression. The magnitude of *cis*-regulatory divergence shows weak positive correlations with**  
 1101 **(D) rates of mutation-adjusted protein evolution ( $K_a/K_s'$ , Spearman's  $\rho = 0.068$ ,  $P < 0.0001$ ;**  
 1102 **linear regression adjusted  $R = 0.019$ ,  $m = 0.015$ ,  $P < 0.0001$ ), (E) overall protein evolution ( $K_a$ ,**  
 1103 **Spearman's  $\rho = 0.066$ ,  $P < 0.0001$ ; linear regression adjusted  $R = 0.023$ ,  $m = 0.006$ ,  $P < 0.0001$ ),**  
 1104 **and (F) non-coding upstream sequence evolution ( $1-P_{cons}$ , Spearman's  $\rho = -0.0008$ ,  $P > 0.05$ ;**  
 1105 **linear regression adjusted  $R = 0.003$ ,  $m = 0.01$ ,  $P < 0.0001$ ). Color scale in D-F indicates density**  
 1106 **of points with brighter colors denoting higher density.**

1107 **Supplementary figures**

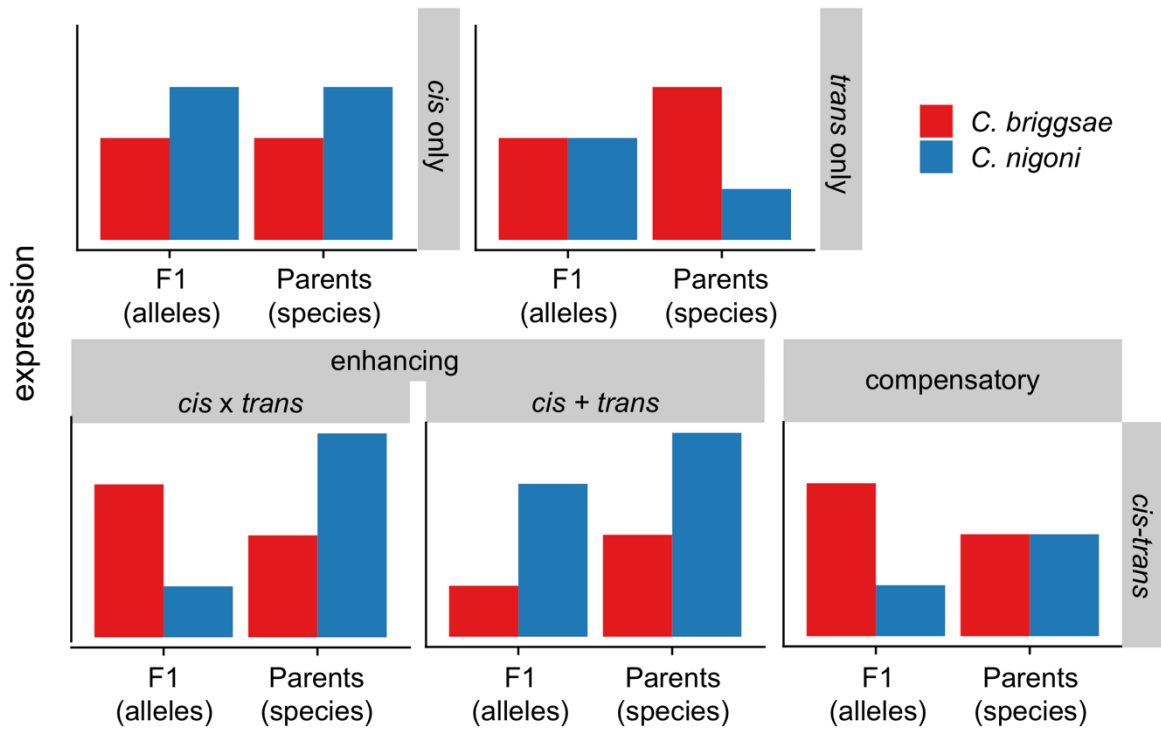

1108

1109 **Supplementary Fig. S1. Qualitative examples of allele-specific expression with their**

1110 **classification of gene regulation type changes.**

1111

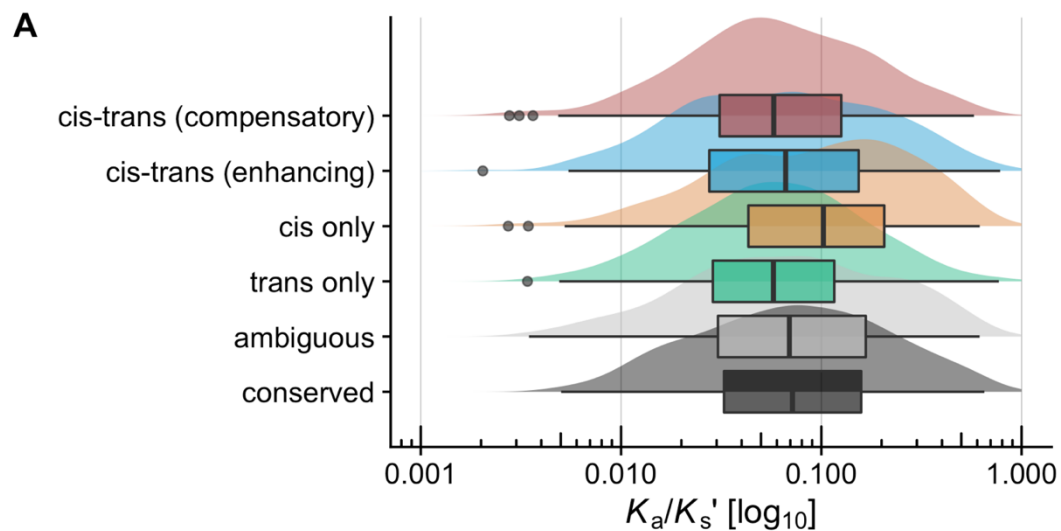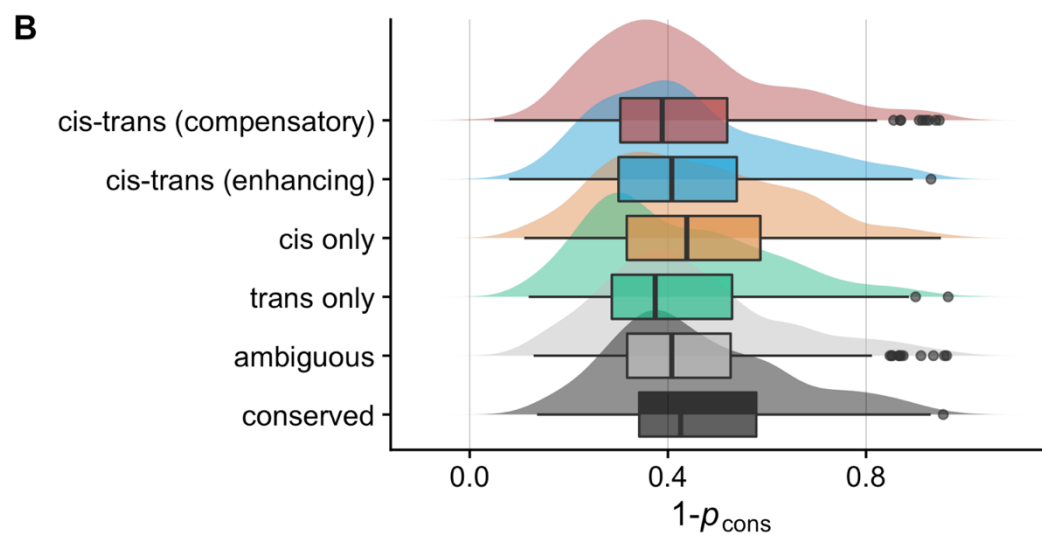

1112  
 1113 Supplementary Fig. S2. X-linked genes (n=1,939) with *cis*-acting effects have higher sequence  
 1114 divergence than other regulatory categories within (a) protein coding genes ( $K_a/K_s'$ , ordinary  
 1115 least squares *cis*-only vs *trans*-only,  $T=2.02$ ,  $P < 0.05$ ) and (b) in upstream regions ( $1-p_{\text{cons}}$ ,  
 1116 ordinary least squares *cis*-only vs *trans*-only,  $T=2.48$ ,  $P < 0.05$ ).

1117

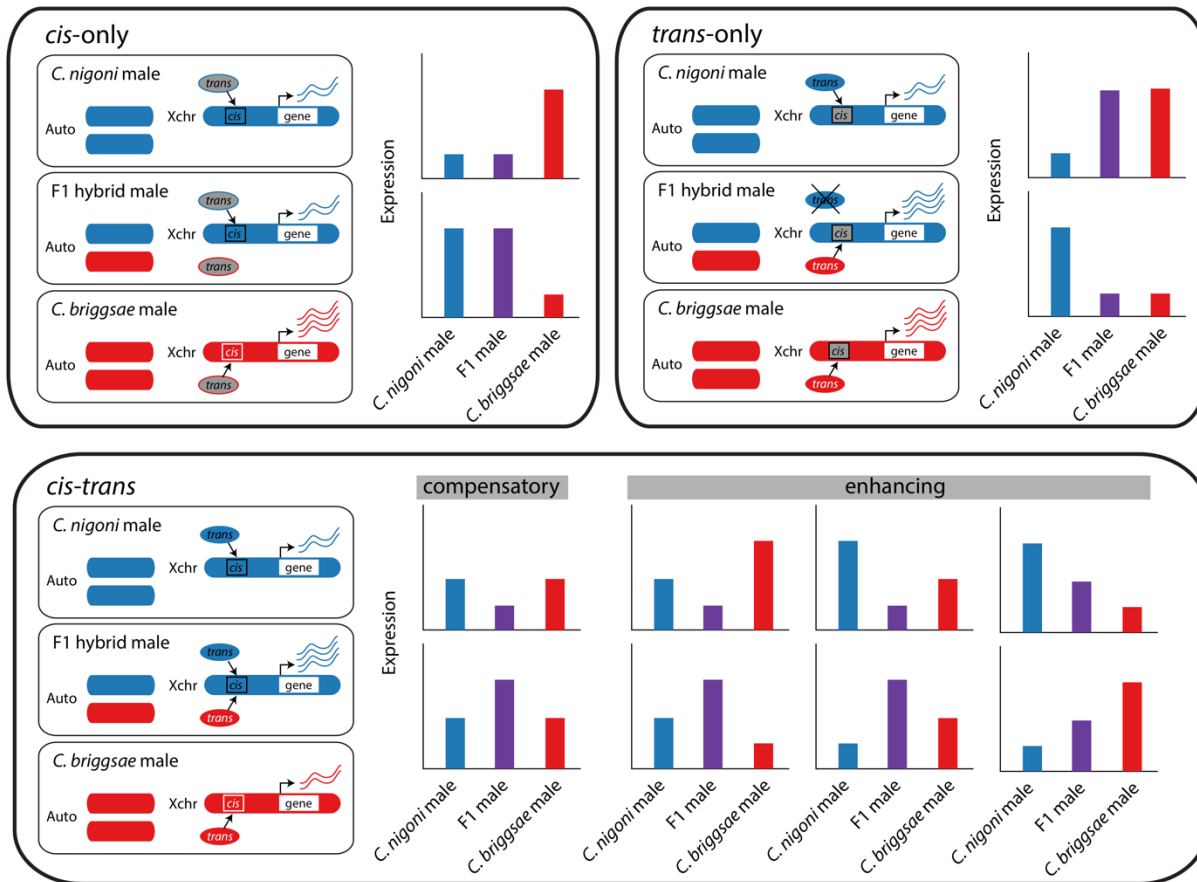

1118  
 1119  
 1120  
 1121  
 1122  
 1123

Supplementary Fig. S3. Qualitative examples to diagram regulatory divergence scoring for the X-chromosome in males that are hemizygous for the X.

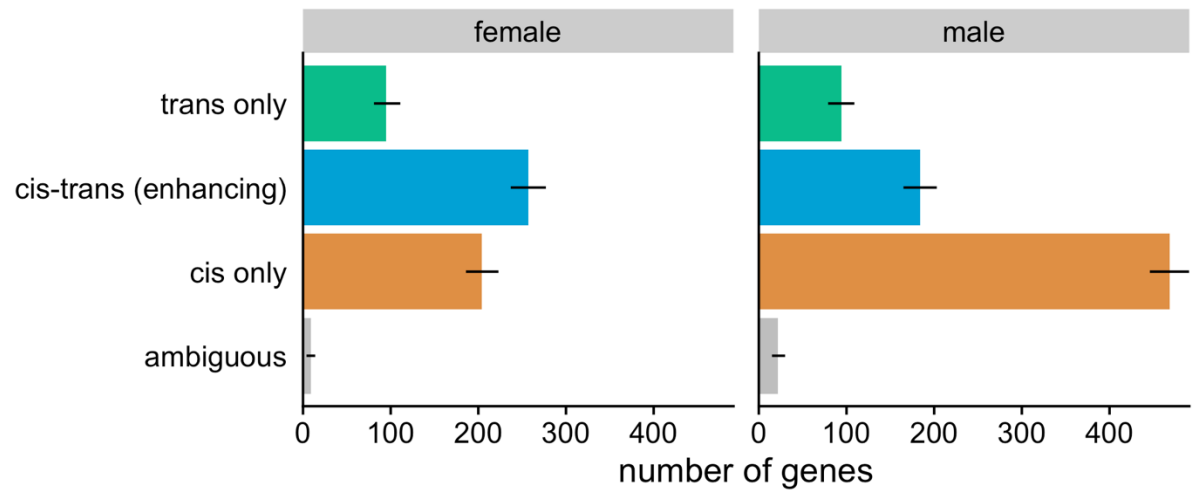

1124

1125 Supplementary Fig. S4. The number of genes with additive expression dominance showing *cis*

1126 and *trans* regulatory changes is distinct for females and males. See also Figure 3 in the main

1127 text. Horizontal bars show 95% interval confidence from non-parametric bootstrapping.

1128

1129

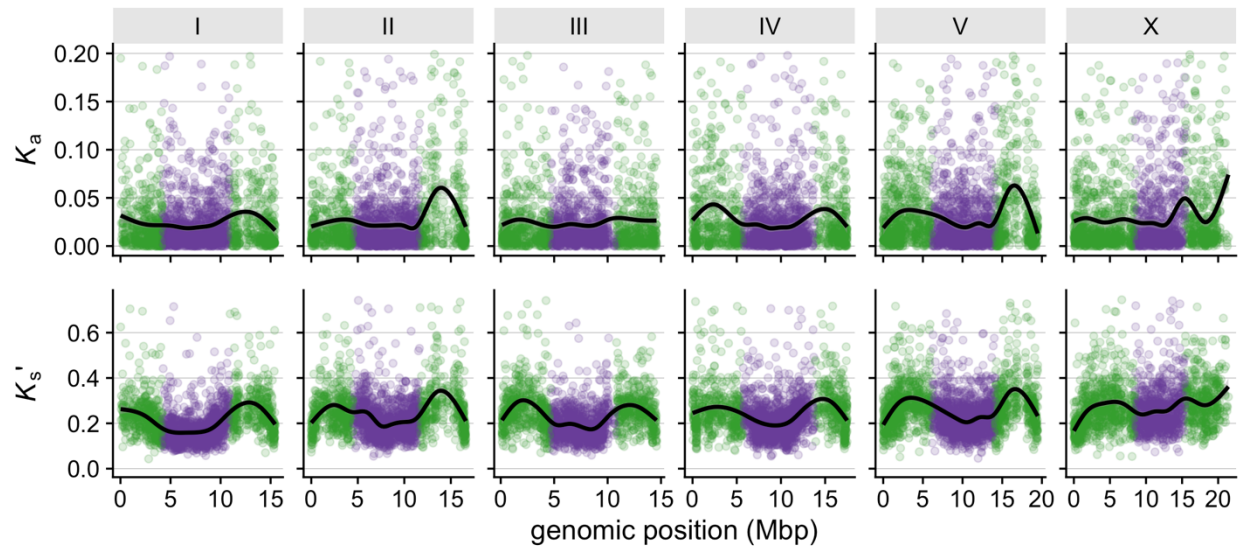

1130  
1131  
1132  
1133  
1134  
1135  
1136  
1137  
1138

Supplementary Fig. S5. Coding sequence evolutionary rates for replacement sites ( $K_a$ ) and synonymous sites ( $K_s'$ , adjusted for selection on codon usage) for 12,115 orthologs between *C. briggsae* and *C. nigoni* along the chromosome positions of the *C. briggsae* genome. Colors mark chromosome arms (green) and center (purple); black lines indicate general additive regression (GAM) trends.

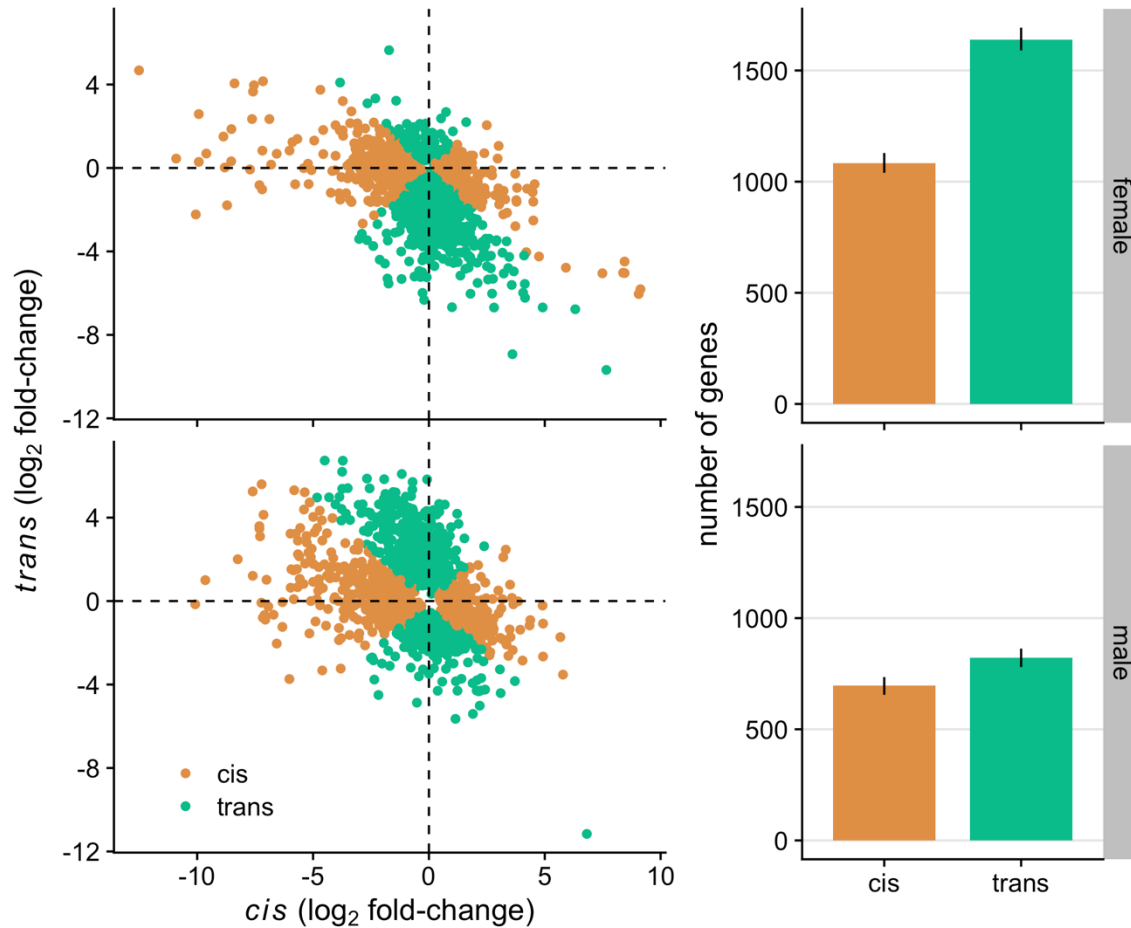

1139  
1140  
1141  
1142  
1143  
1144  
1145  
1146  
1147

Supplementary Fig. S6. Biplots of *cis* vs *trans* effects for genes with significant sex-bias. *trans* divergence was measured as the  $\log_2$  expression difference between parent species (*cis* and *trans*) - the  $\log_2$  expression difference between alleles in F1 hybrids (*cis*). Genes with *cis*-only and *trans*-only effects were kept as *cis* and *trans* respectively, whereas genes with significant joint *cis-trans* effects in this analysis were deemed *cis* if  $\text{abs}(\text{cis}) > \text{abs}(\text{trans})$  and vice versa to be deemed *trans*. Error bars were calculated using non-parametric bootstrapping ( $n=1000$ ). Female transcriptomes in top panels; males in bottom panels.



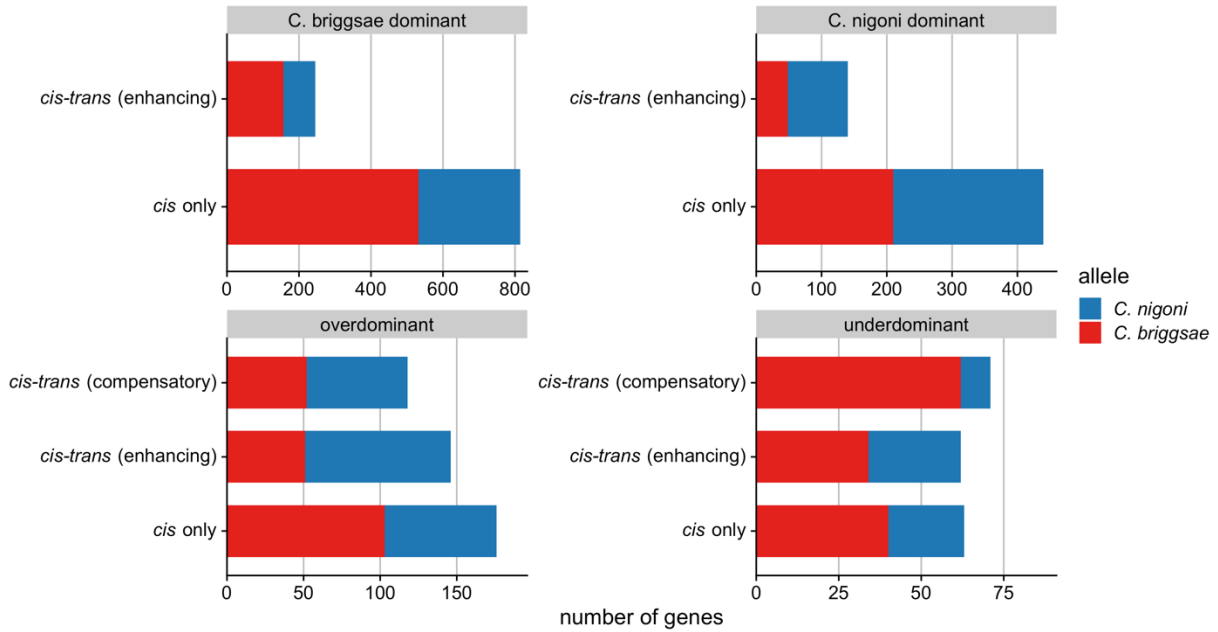

1148  
1149  
1150  
1151  
1152  
1153

Supplementary Fig. S7. Number of autosomal genes with significant allele-specific expression showing simple expression dominance of one species (top panels) and transgressive over- or under-dominance. Genes with conserved regulation or *trans*-only effects were excluded for not having significant allele specific expression.

1154

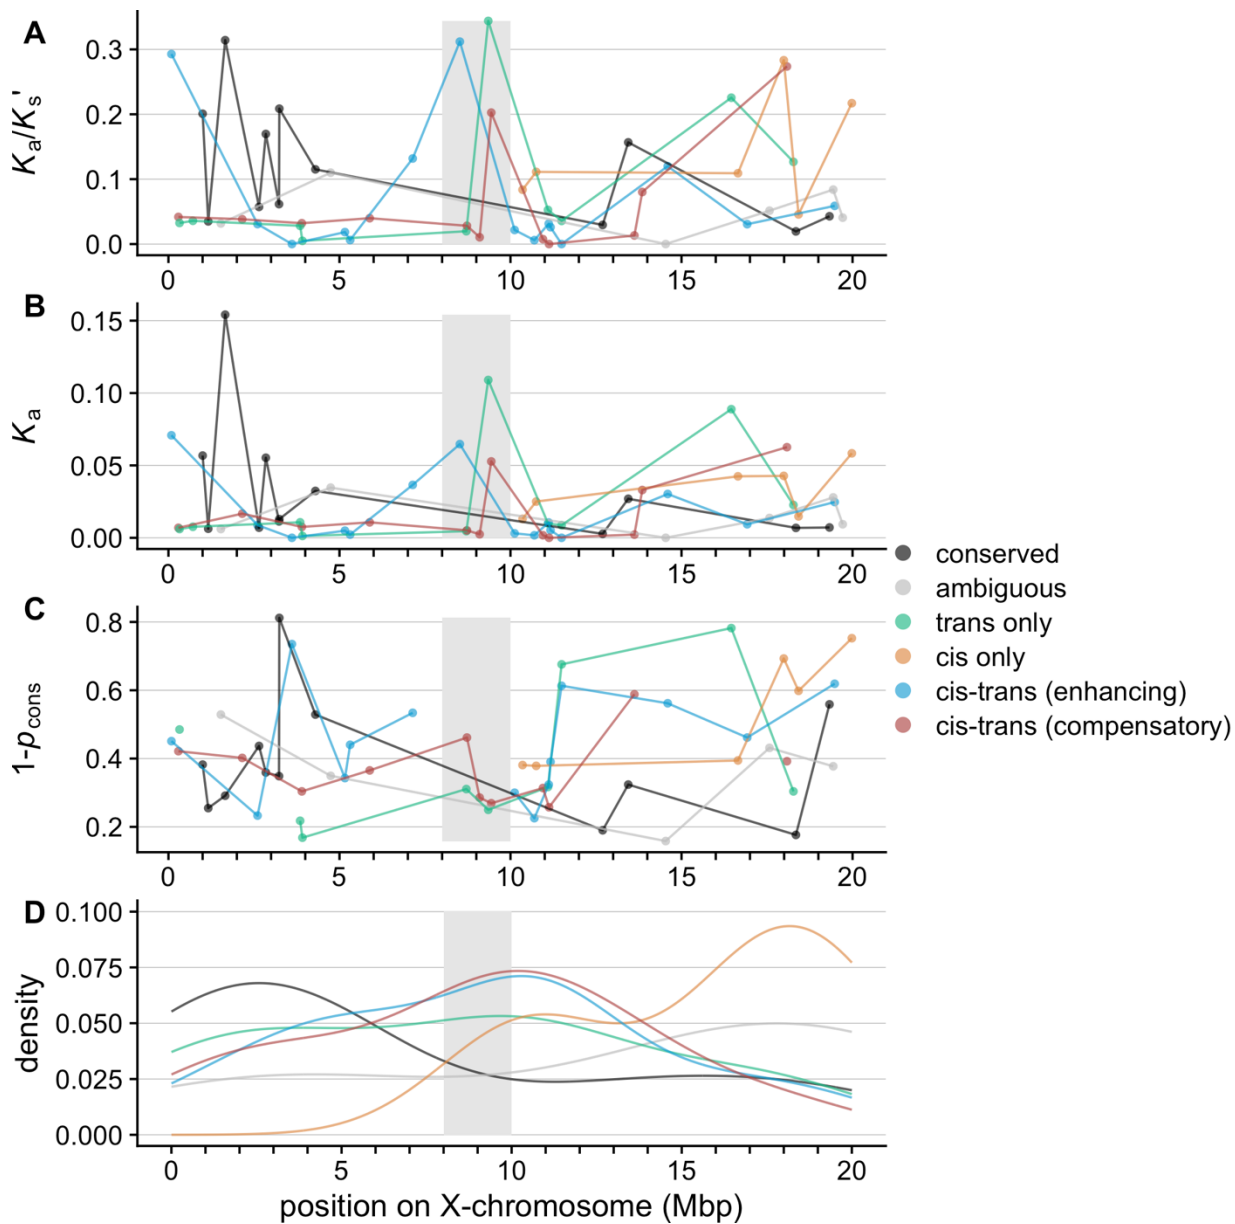

1155

1156

1157 Supplementary Fig. S8. Protein-coding (A-B) and upstream non-coding (C) sequence divergence  
 1158 in X-linked spermatogenesis genes (n=61; also see Fig. 4F-H) with different types of regulatory  
 1159 divergence. (D) Shows gene density (n=1,939) for different *cis* and *trans* effects along  
 1160 Chromosome X. The shaded area near 10 Mbp marks genes with *trans*, enhancing *cis-trans*, and  
 1161 compensatory *cis-trans* effects with high protein-coding sequence divergence. This also  
 1162 overlaps with GFP-marked chromosome regions found to have sterility effects on hybrid males  
 1163 (Bi et al. 2019).

1164

1165
